# Supplementary material for: On the stability of peptide secondary structures on the TiO2(101) anatase surface: a computational insight
Source: Royal Society of Chemistry journal article supplement (doi:10.1039/d2cp04395e), 2022-12-01
Supplement: d2cp04395e1.pdf [file d2cp04395e1.pdf]

**On the stability of peptide secondary structures on the TiO<sub>2</sub> (101)  
anatase surface: a computational insight**

Electronic Supplementary Information

Stefano Pantaleone,<sup>a,b\*</sup> Mariona Sodupe,<sup>a</sup> Piero Ugliengo,<sup>b</sup> Albert Rimola<sup>a,\*</sup>

<sup>a</sup>*Departament de Química, Universitat Autònoma de Barcelona, Bellaterra 08193,  
Spain*

<sup>b</sup>*Dipartimento di Chimica and Nanostructured Interfaces and Surfaces (NIS) Inter-  
Departmental centre, Università degli Studi di Torino, Via P. Giuria 7, 10125 Torino,  
Italy*

E-mail corresponding authors:

[stefano.pantaleone@unito.it](mailto:stefano.pantaleone@unito.it)

[albert.rimola@uab.cat](mailto:albert.rimola@uab.cat)

**Table S1.** Cell parameters for the linear polyamino acidic (AA) systems interacting with the TiO<sub>2</sub> surface, and optimized as isolated in the gas phase.

|            | TiO <sub>2</sub> cell parameters |        |          |         |          | AA cell parameter |        |
|------------|----------------------------------|--------|----------|---------|----------|-------------------|--------|
|            | a                                | b      | $\alpha$ | $\beta$ | $\gamma$ | a                 | Diff % |
| GLY_linear | 7.569                            | 10.239 | 90.000   | 90.000  | 90.000   | 7.236             | -4.61  |
| ALA_linear |                                  |        |          |         |          | 7.172             | -5.53  |
| GLU_linear |                                  |        |          |         |          | 7.180             | -5.41  |
| ARG_linear |                                  |        |          |         |          | 7.192             | -5.24  |
| LYS_linear |                                  |        |          |         |          | 7.184             | -5.35  |

**Table S2.** Cell parameters for the  $\beta$ -sheet polyamino acidic (AA) systems interacting with the TiO<sub>2</sub> surface, and optimized as isolated in the gas phase.

|                        | TiO <sub>2</sub> cell parameters |        |          |         |          | AA cell parameters |        |          |         |          | Diff (a) % | Diff (b) % |
|------------------------|----------------------------------|--------|----------|---------|----------|--------------------|--------|----------|---------|----------|------------|------------|
|                        | a                                | b      | $\alpha$ | $\beta$ | $\gamma$ | a                  | b      | $\alpha$ | $\beta$ | $\gamma$ |            |            |
| GLY_ $\beta$ -sheet_AP | 7.569                            | 10.239 | 90.000   | 90.000  | 90.000   | 7.278              | 9.693  | 89.997   | 90.008  | 90.000   | -4.00      | -5.64      |
| GLY_ $\beta$ -sheet_P  |                                  |        |          |         |          | 7.264              | 10.108 | 90.000   | 90.006  | 90.023   | -4.20      | -1.30      |
| ALA_ $\beta$ -sheet_AP |                                  |        |          |         |          | 7.097              | 9.552  | 90.000   | 90.179  | 90.028   | -6.65      | -7.19      |
| ALA_ $\beta$ -sheet_P  |                                  |        |          |         |          | 7.149              | 9.948  | 91.111   | 89.936  | 89.894   | -5.88      | -2.93      |
| GLU_ $\beta$ -sheet_AP |                                  |        |          |         |          | 7.076              | 9.552  | 90.096   | 89.055  | 89.943   | -6.97      | -7.20      |
| GLU_ $\beta$ -sheet_P  |                                  |        |          |         |          | 7.152              | 9.733  | 89.720   | 89.651  | 89.990   | -5.83      | -5.20      |
| ARG_ $\beta$ -sheet_AP |                                  |        |          |         |          | 7.055              | 9.559  | 89.996   | 89.666  | 89.131   | -7.28      | -7.11      |
| ARG_ $\beta$ -sheet_P  |                                  |        |          |         |          | 7.090              | 9.308  | 86.053   | 87.268  | 89.607   | -6.75      | -10.01     |
| LYS_ $\beta$ -sheet_AP |                                  |        |          |         |          | 7.056              | 9.606  | 87.096   | 87.371  | 90.468   | -7.27      | -6.59      |
| LYS_ $\beta$ -sheet_P  |                                  |        |          |         |          | 7.083              | 9.793  | 84.047   | 90.983  | 89.914   | -6.87      | -4.56      |

**Table S3.** Cell parameters for the  $\alpha$ -helix polyamino acidic (AA) systems interacting with the TiO<sub>2</sub> surface, and optimized as isolated in the gas phase.

|                      | TiO <sub>2</sub> cell parameters |        |          |         |          | AA cell parameters |       |
|----------------------|----------------------------------|--------|----------|---------|----------|--------------------|-------|
|                      | a                                | b      | $\alpha$ | $\beta$ | $\gamma$ | b                  | Diff% |
| GLY_ $\alpha$ -helix | 15.138                           | 10.239 | 90.000   | 90.000  | 90.000   | 10.424             | 1.78  |
| ALA_ $\alpha$ -helix |                                  |        |          |         |          | 10.429             | 1.82  |
| GLU_ $\alpha$ -helix |                                  |        |          |         |          | 10.393             | 1.48  |
| ARG_ $\alpha$ -helix |                                  |        |          |         |          | 10.405             | 1.59  |
| LYS_ $\alpha$ -helix |                                  |        |          |         |          | 10.392             | 1.47  |

**Table S4.** Calculated total adsorption energies ( $\Delta E_{ADS}$ ) and adsorption energy normalized per amino acidic unit ( $\Delta E_{ADS/unit}$ ) for each studied complex, both in the gas phase and under PCM conditions. Other energetic terms of interest are also included: the energetic gain due to the secondary structure formation with respect to the extended primary polymeric structure ( $\Delta E_{H/unit}$ ), the deformation energy of the secondary structure due to the adsorption ( $\Delta E_{def/unit}$ ), and the sum of these two terms ( $\Delta E_{H+def/unit}$ ). Energy units are in  $\text{kJ mol}^{-1}$ .

| System                           | AA units | Gas-phase        |                       |                     |                       |                         | PCM              |                       |                     |                       |                         |
|----------------------------------|----------|------------------|-----------------------|---------------------|-----------------------|-------------------------|------------------|-----------------------|---------------------|-----------------------|-------------------------|
|                                  |          | $\Delta E_{ADS}$ | $\Delta E_{ADS/unit}$ | $\Delta E_{H/unit}$ | $\Delta E_{def/unit}$ | $\Delta E_{H+def/unit}$ | $\Delta E_{ADS}$ | $\Delta E_{ADS/unit}$ | $\Delta E_{H/unit}$ | $\Delta E_{def/unit}$ | $\Delta E_{H+def/unit}$ |
| GLY_extended/TiO <sub>2</sub>    | 2        | -62.0            | -31.0                 | 0.0                 | 15.3                  | 15.3                    | -3.8             | -1.9                  | 0.0                 | 13.7                  | 13.7                    |
| GLY_β-sheet_AP/TiO <sub>2</sub>  | 4        | -120.8           | -30.2                 | -23.6               | 23.0                  | -0.6                    | -0.5             | -0.1                  | -9.1                | 19.7                  | 10.6                    |
| GLY_β-sheet_P/TiO <sub>2</sub>   | 4        | -115.6           | -28.9                 | -18.5               | 19.6                  | 1.1                     | -3.6             | -0.9                  | -3.8                | 13.8                  | 10.0                    |
| GLY_β-sheet_BRK/TiO <sub>2</sub> | 4        | -123.2           | -30.8                 | 0.0                 | 11.8                  | 11.8                    | -16.4            | -4.1                  | 0.0                 | 10.4                  | 10.4                    |
| GLY_α-helix_1/TiO <sub>2</sub>   | 7        | -220.5           | -31.5                 | -21.5               | 8.6                   | -12.9                   | -84.1            | -12.0                 | -9.9                | 5.9                   | -4.0                    |
| GLY_α-helix/TiO <sub>2</sub>     | 7        | -235.9           | -33.7                 | -21.5               | 14.1                  | -7.4                    | -80.8            | -11.5                 | -9.9                | 9.4                   | -0.5                    |
| ALA_extended/TiO <sub>2</sub>    | 2        | -63.4            | -31.7                 | 0.0                 | 18.6                  | 18.6                    | -2.9             | -1.5                  | 0.0                 | 17.4                  | 17.4                    |
| ALA_β-sheet_AP/TiO <sub>2</sub>  | 4        | -69.7            | -17.4                 | -27.4               | 22.2                  | -5.2                    | 15.3             | 3.8                   | -14.5               | 21.5                  | 6.9                     |
| ALA_β-sheet_P/TiO <sub>2</sub>   | 4        | -61.9            | -15.5                 | -20.9               | 17.2                  | -3.7                    | 16.7             | 4.2                   | -9.8                | 18.5                  | 8.7                     |
| ALA_α-helix/TiO <sub>2</sub>     | 7        | -186.1           | -26.6                 | -23.2               | 5.2                   | -18.0                   | -79.3            | -11.3                 | -11.9               | 5.1                   | -6.8                    |

|                                 |   |        |        |       |      |       |        |       |       |      |      |
|---------------------------------|---|--------|--------|-------|------|-------|--------|-------|-------|------|------|
| GLU_extended/TiO <sub>2</sub>   | 2 | -109.6 | -54.8  | 0.0   | 25.8 | 25.8  | 7.6    | 3.8   | 0.0   | 22.0 | 22.0 |
| GLU_β-sheet_AP/TiO <sub>2</sub> | 4 | -228.5 | -57.1  | -37.6 | 34.9 | -2.7  | -75.1  | -18.8 | -20.9 | 36.1 | 15.2 |
| GLU_β-sheet_P/TiO <sub>2</sub>  | 4 | -262.0 | -65.5  | -36.8 | 30.0 | -6.8  | -93.5  | -23.4 | -10.2 | 22.5 | 12.3 |
| GLU_α-helix/TiO <sub>2</sub>    | 7 | -412.8 | -59.0  | -31.6 | 12.4 | -19.3 | -141.3 | -20.2 | -15.1 | 10.7 | -4.4 |
| LYS_extended/TiO <sub>2</sub>   | 2 | -217.3 | -108.6 | 0.0   | 50.8 | 50.8  | -73.9  | -36.9 | 0.0   | 48.9 | 48.9 |
| LYS_β-sheet_AP/TiO <sub>2</sub> | 4 | -270.7 | -67.7  | -39.3 | 29.1 | -10.2 | -154.9 | -34.3 | -22.3 | 25.7 | 3.4  |
| LYS_β-sheet_P/TiO <sub>2</sub>  | 4 | -286.9 | -71.7  | -36.4 | 24.2 | -12.1 | -137.3 | -38.7 | -19.7 | 21.4 | 1.6  |
| LYS_α-helix/TiO <sub>2</sub>    | 7 | -589.5 | -84.2  | -23.3 | 9.8  | -13.5 | -323.3 | -46.2 | -10.1 | 11.1 | 1.0  |
| ARG_extended/TiO <sub>2</sub>   | 2 | -293.6 | -146.8 | 0.0   | 46.6 | 46.6  | -136.1 | -68.1 | 0.0   | 40.5 | 40.5 |
| ARG_β-sheet_AP/TiO <sub>2</sub> | 4 | -271.7 | -67.9  | -60.9 | 59.0 | -1.9  | -114.0 | -28.5 | -29.1 | 43.5 | 14.4 |
| ARG_β-sheet_P/TiO <sub>2</sub>  | 4 | 287.3  | -71.8  | -74.8 | 64.2 | -10.6 | -140.3 | -35.1 | -30.0 | 34.1 | 4.1  |
| ARG_α-helix/TiO <sub>2</sub>    | 7 | 578.4  | -82.6  | -23.5 | 3.8  | -19.7 | -270.2 | -38.6 | -8.8  | 8.0  | -0.9 |

**Table S5.** Values of the reaction energies (in kJ/mol) of the  $\alpha$ -helix  $\rightarrow$   $\beta$ -sheet conformational change of the isolated secondary structures and on the the TiO<sub>2</sub> (101) anatase surface ( $\Delta\Delta E_{surf/unit}$ ), including the involved energy terms according to the energy cycle shown in Figure 4, both in the gas phase and in implicit PCM water solvent ( $\Delta\Delta E_{surf/unit} = \Delta E_{ADS/unit}^{(\beta)} - \Delta E_{ADS/unit}^{(\alpha)} + \Delta\Delta E_{iso/unit}$ ). See in the text and in ESI the details on the definition of the energy terms.

| Reaction                                                                        | Conditions       | $\Delta E_{ADS/unit}^{(\beta)}$ | $\Delta E_{ADS/unit}^{(\alpha)}$ | $\Delta\Delta E_{iso/unit}$ | $\Delta\Delta E_{surf/unit}$ |
|---------------------------------------------------------------------------------|------------------|---------------------------------|----------------------------------|-----------------------------|------------------------------|
| GLY_α-helix/TiO <sub>2</sub> $\rightarrow$<br>GLY_β-sheet_AP/TiO <sub>2</sub>   | Gas-phase<br>PCM | -6.6<br>9.0                     | -12.2<br>-1.6                    | -2.1<br>0.8                 | 3.5<br>11.4                  |
| GLY_α-helix/TiO <sub>2</sub> $\rightarrow$<br>GLY_β-sheet_P/TiO <sub>2</sub>    | Gas-phase<br>PCM | -10.4<br>2.9                    | -12.2<br>-1.6                    | 3.0<br>6.1                  | 4.8<br>10.6                  |
| GLY_α-helix_1/TiO <sub>2</sub> $\rightarrow$<br>GLY_β-sheet_AP/TiO <sub>2</sub> | Gas-phase<br>PCM | -6.6<br>9.0                     | -9.9<br>-2.1                     | -2.1<br>0.8                 | 1.2<br>11.9                  |
| GLY_α-helix_1/TiO <sub>2</sub> $\rightarrow$<br>GLY_β-sheet_P/TiO <sub>2</sub>  | Gas-phase<br>PCM | -10.4<br>2.9                    | -9.9<br>-2.1                     | 3.0<br>6.1                  | 2.5<br>11.1                  |
| ALA_α-helix/TiO <sub>2</sub> $\rightarrow$<br>ALA_β-sheet_AP/TiO <sub>2</sub>   | Gas-phase<br>PCM | 10.0<br>18.7                    | -3.3<br>0.5                      | -4.2<br>-2.6                | 9.2<br>15.5                  |
| ALA_α-helix/TiO <sub>2</sub> $\rightarrow$<br>ALA_β-sheet_P/TiO <sub>2</sub>    | Gas-phase<br>PCM | 5.5<br>13.6                     | -3.3<br>0.5                      | 2.3<br>2.1                  | 11.1<br>15.2                 |
| GLU_α-helix/TiO <sub>2</sub> $\rightarrow$<br>GLU_β-sheet_AP/TiO <sub>2</sub>   | Gas-phase<br>PCM | -19.6<br>2.1                    | -27.3<br>-5.1                    | -5.9<br>-5.8                | 1.8<br>1.4                   |
| GLU_α-helix/TiO <sub>2</sub> $\rightarrow$<br>GLU_β-sheet_P/TiO <sub>2</sub>    | Gas-phase<br>PCM | -28.7<br>-13.2                  | -27.3<br>-5.1                    | -5.2<br>5.0                 | -6.5<br>-3.2                 |
| LYS_α-helix/TiO <sub>2</sub> $\rightarrow$<br>LYS_β-sheet_AP/TiO <sub>2</sub>   | Gas-phase<br>PCM | -28.4<br>-12.0                  | -60.9<br>-36.1                   | -16.0<br>-12.2              | 16.5<br>11.9                 |
| LYS_α-helix/TiO <sub>2</sub> $\rightarrow$<br>LYS_β-sheet_P/TiO <sub>2</sub>    | Gas-phase<br>PCM | -35.4<br>-19.0                  | -60.9<br>-36.1                   | -13.1<br>-9.7               | 12.5<br>7.5                  |
| ARG_α-helix/TiO <sub>2</sub> $\rightarrow$<br>ARG_β-sheet_AP/TiO <sub>2</sub>   | Gas-phase<br>PCM | -7.0<br>0.6                     | -59.1<br>-29.8                   | -37.4<br>-20.3              | 14.7<br>10.1                 |
| ARG_α-helix/TiO <sub>2</sub> $\rightarrow$<br>ARG_β-sheet_P/TiO <sub>2</sub>    | Gas-phase<br>PCM | 3.0<br>-5.1                     | -59.1<br>-29.8                   | -51.3<br>-21.1              | 10.8<br>3.5                  |

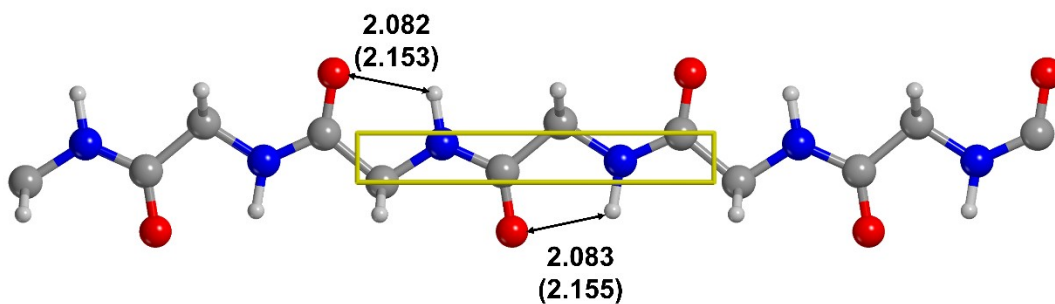

**Figure S1.** PBE-D2\* optimized geometry for the isolated periodic linear polyglycine polymer (GLY\_linear). Bare values refer to distances for optimized structures in the gas phase, while the values in parenthesis are for those optimized with the PCM. The unit cell is represented in yellow. Bond distances are in Å. Hydrogen in white, carbon in grey, oxygen in red, nitrogen in blue.



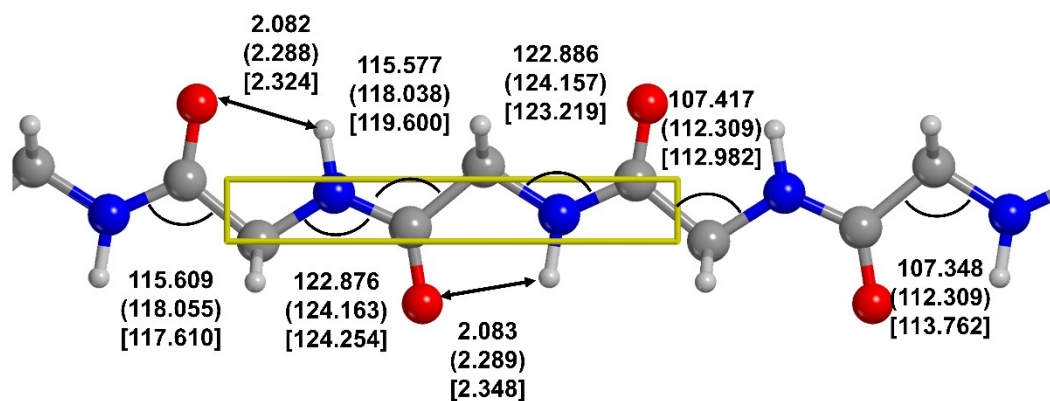

**Figure S2.** PBE-D2\* optimized geometries of the fully optimized isolated periodic linear polyglycine polymer (GLY\_linear, geometrical parameters without parenthesis), of the isolated periodic linear polyglycine polymer, using the cell parameters of the surface (geometrical parameters in round parenthesis), and upon adsorption on the TiO<sub>2</sub> surface (geometrical parameters in square parenthesis). The unit cell is represented in yellow. Bond distances are in Å. Hydrogen in white, carbon in grey, oxygen in red, nitrogen in blue.

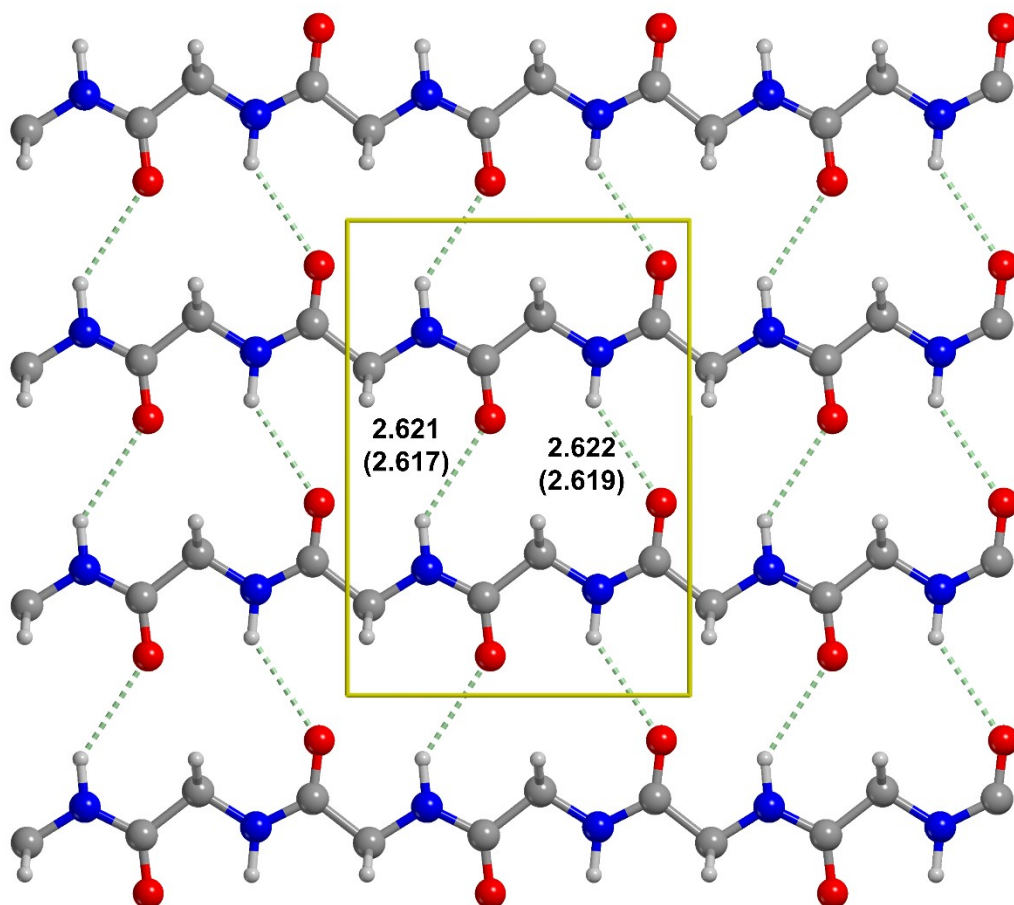

**Figure S3.** PBE-D2\* optimized geometry for the isolated periodic parallel polyglycine  $\beta$ -sheet (GLY\_ $\beta$ -sheet\_P). Bare values refer to distances for optimized structures in the gas phase, while the values in parenthesis are for those optimized with the PCM. The unit cell is represented in yellow. Bond distances are in Å. Hydrogen in white, carbon in grey, oxygen in red, nitrogen in blue.

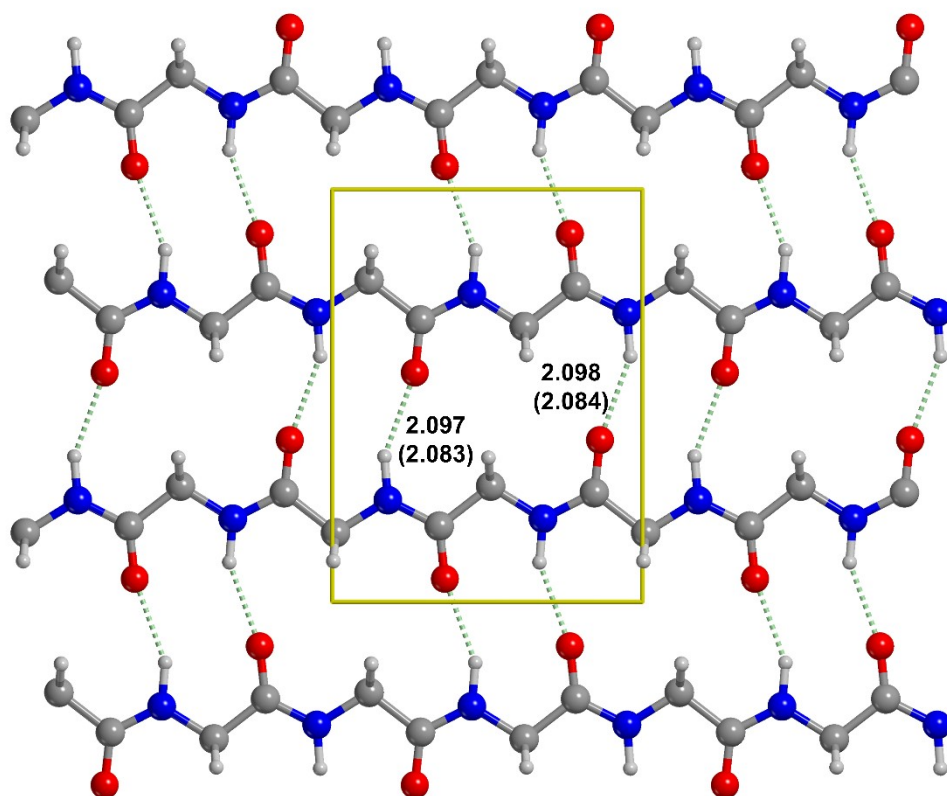

**Figure S4.** PBE-D2\* optimized geometry for the isolated periodic antiparallel polyglycine  $\beta$ -sheet (GLY\_ $\beta$ -sheet\_AP). Bare values refer to distances for optimized structures in the gas phase, while the values in parenthesis are for those optimized with the PCM. The unit cell is represented in yellow. Bond distances are in Å. Hydrogen in white, carbon in grey, oxygen in red, nitrogen in blue.

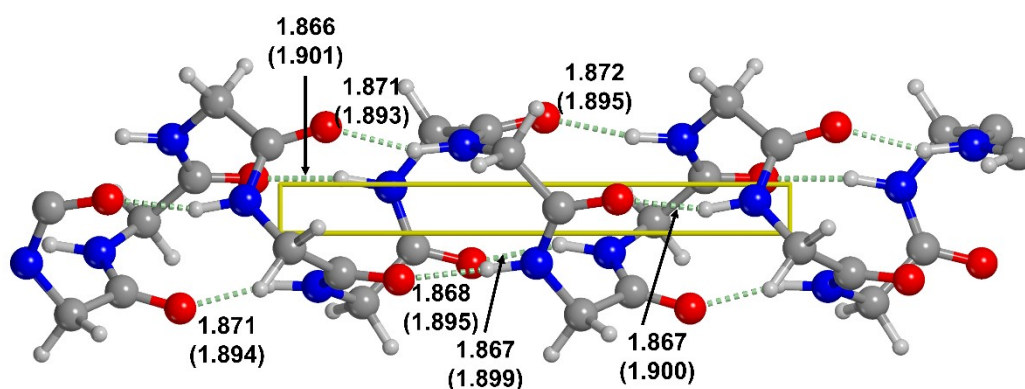

**Figure S5.** PBE-D2\* optimized geometry for the isolated periodic polyglycine  $\alpha$ -helix (GLY\_ $\alpha$ -helix). Bare values refer to distances for optimized structures in the gas phase, while the values in parenthesis are for those optimized with the PCM. The unit cell is represented in yellow. Bond distances are in Å. Hydrogen in white, carbon in grey, oxygen in red, nitrogen in blue.

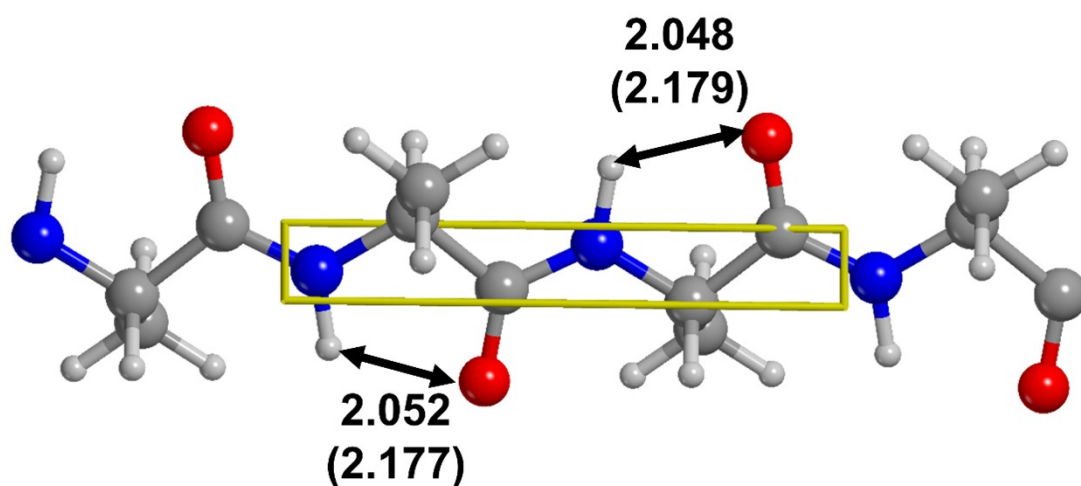

**Figure S6.** PBE-D2\* optimized geometry for the isolated periodic linear polyalanine polymer (ALA\_linear). Bare values refer to distances for optimized structures in the gas phase, while the values in parenthesis are for those optimized with the PCM. The unit cell is represented in yellow. Bond distances are in Å. Hydrogen in white, carbon in grey, oxygen in red, nitrogen in blue.

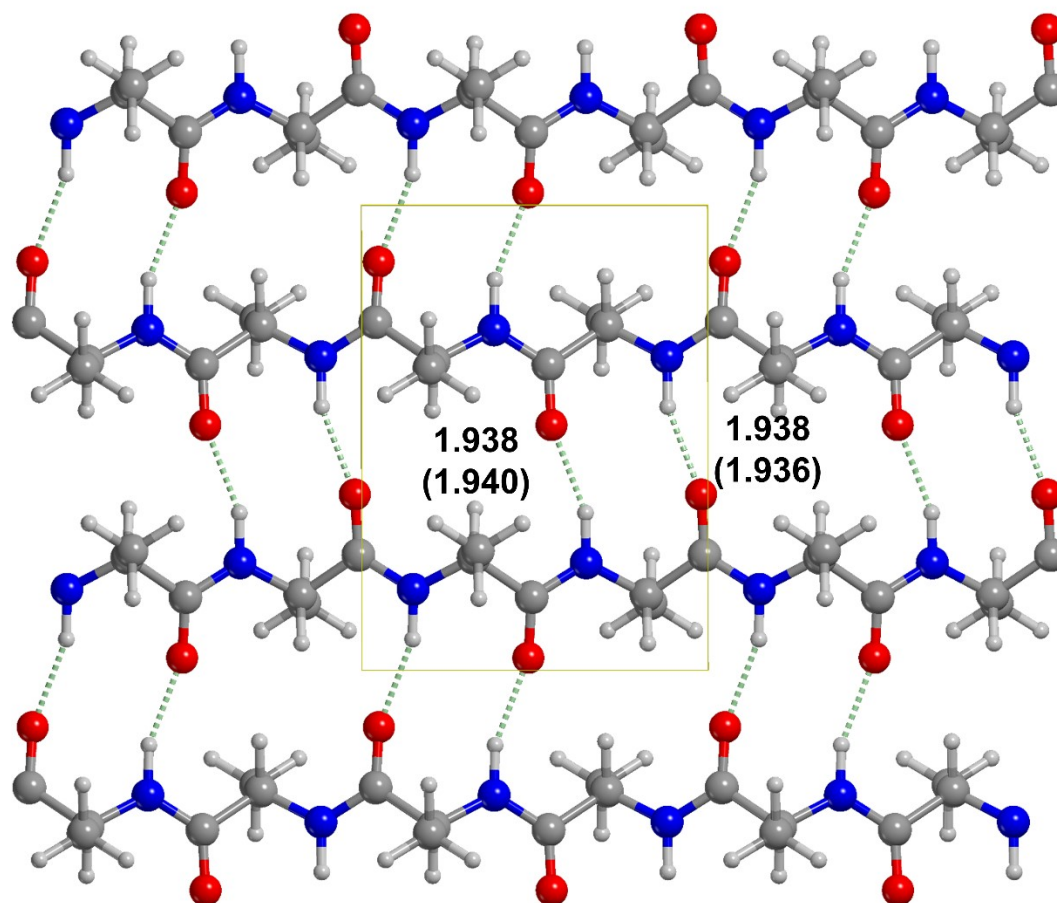

**Figure S7.** PBE-D2\* optimized geometry for the isolated periodic antiparallel polyalanine  $\beta$ -sheet (ALA\_ $\beta$ -sheet\_AP). Bare values refer to distances for optimized structures in the gas phase, while the values in parenthesis are for those optimized with the PCM. The unit cell is represented in yellow. Bond distances are in Å. Hydrogen in white, carbon in grey, oxygen in red, nitrogen in blue.

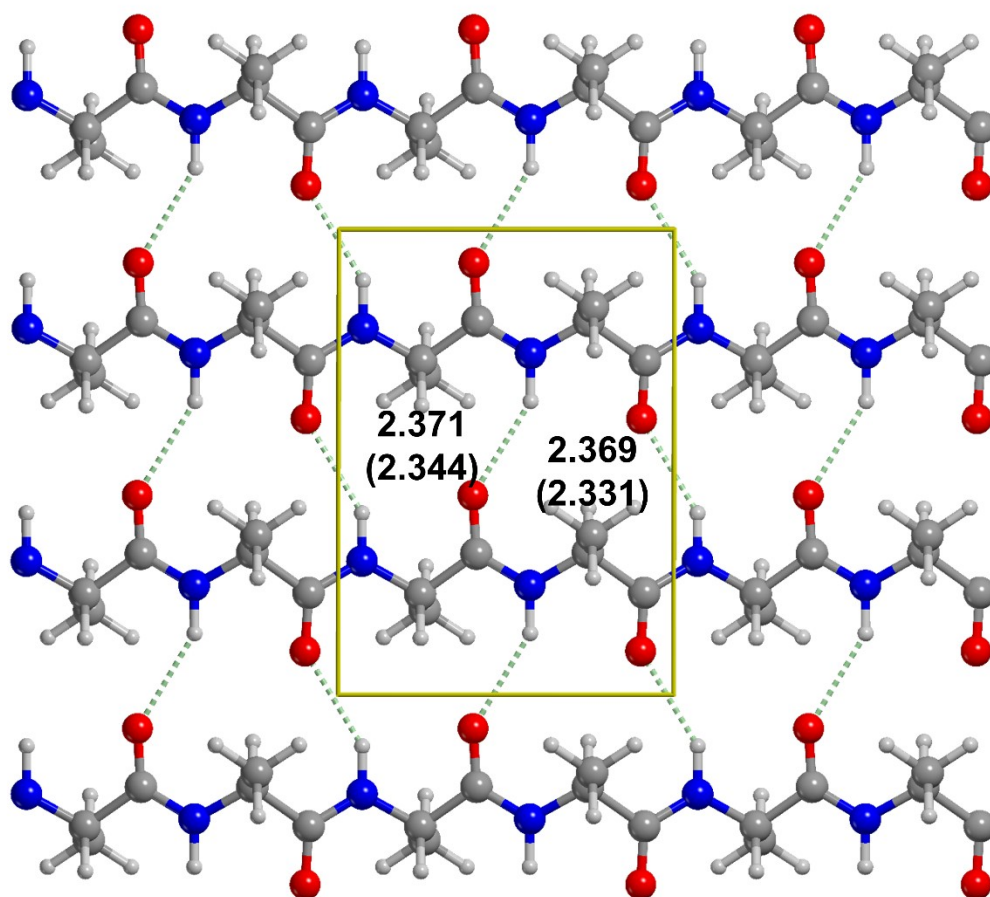

**Figure S8.** PBE-D2\* optimized geometry for the isolated periodic parallel polyalanine  $\beta$ -sheet (ALA\_ $\beta$ -sheet\_P). Bare values refer to distances for optimized structures in the gas phase, while the values in parenthesis are for those optimized with the PCM. The unit cell is represented in yellow. Bond distances are in Å. Hydrogen in white, carbon in grey, oxygen in red, nitrogen in blue.

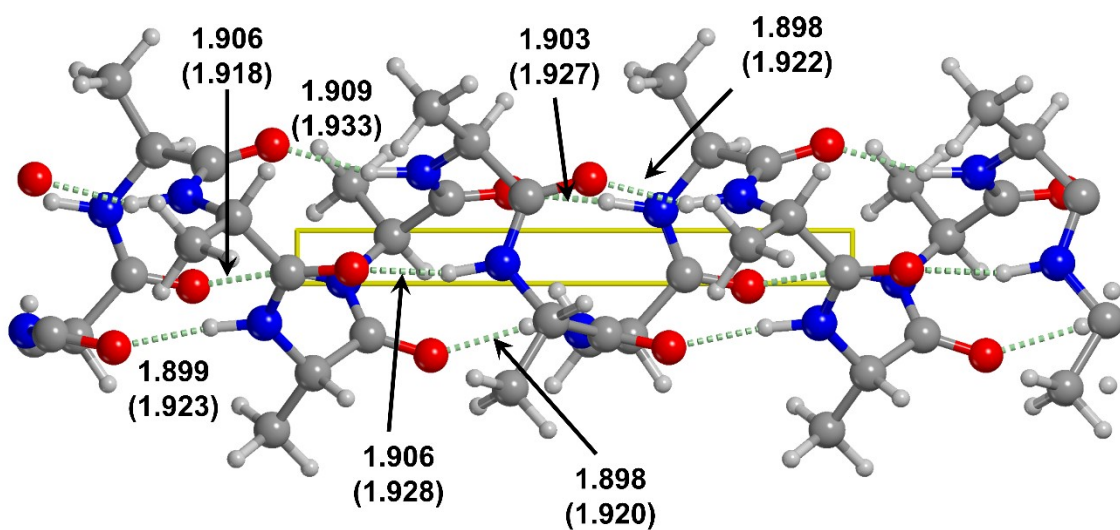

**Figure S9.** PBE-D2\* optimized geometry for the isolated periodic polyaniline  $\alpha$ -helix (ALA\_  $\alpha$ -helix). Bare values refer to distances for optimized structures in the gas phase, while the values in parenthesis are for those optimized with the PCM. The unit cell is represented in yellow. Bond distances are in Å. Hydrogen in white, carbon in grey, oxygen in red, nitrogen in blue.



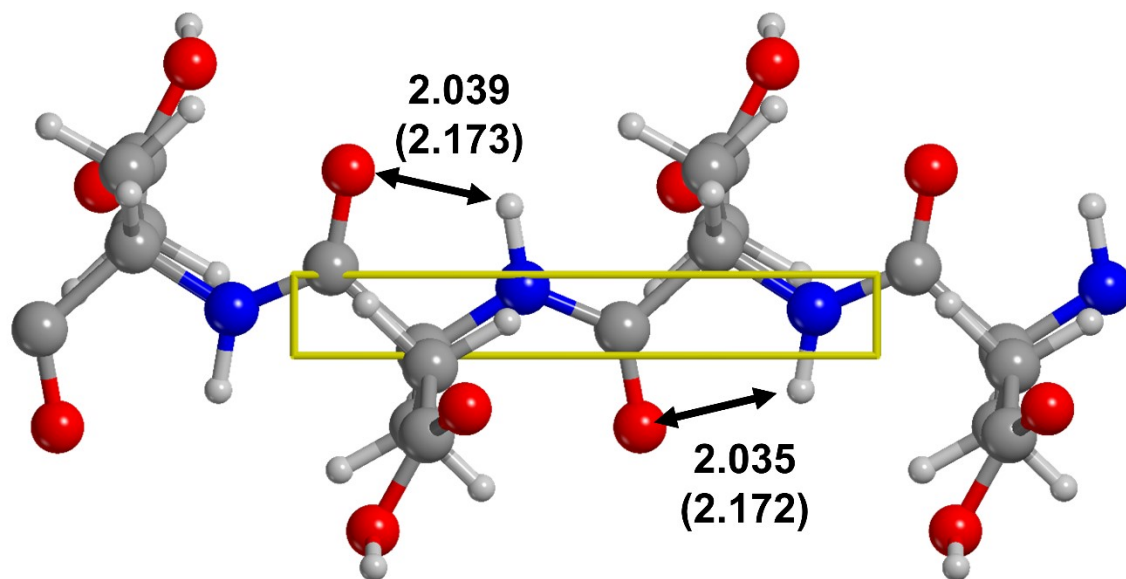

**Figure S10.** PBE-D2\* optimized geometry for the isolated periodic linear polyglutamic acid polymer (GLU\_linear). Bare values refer to distances for optimized structures in the gas phase, while the values in parenthesis are for those optimized with the PCM. The unit cell is represented in yellow. Bond distances are in Å. Hydrogen in white, carbon in grey, oxygen in red, nitrogen in blue.

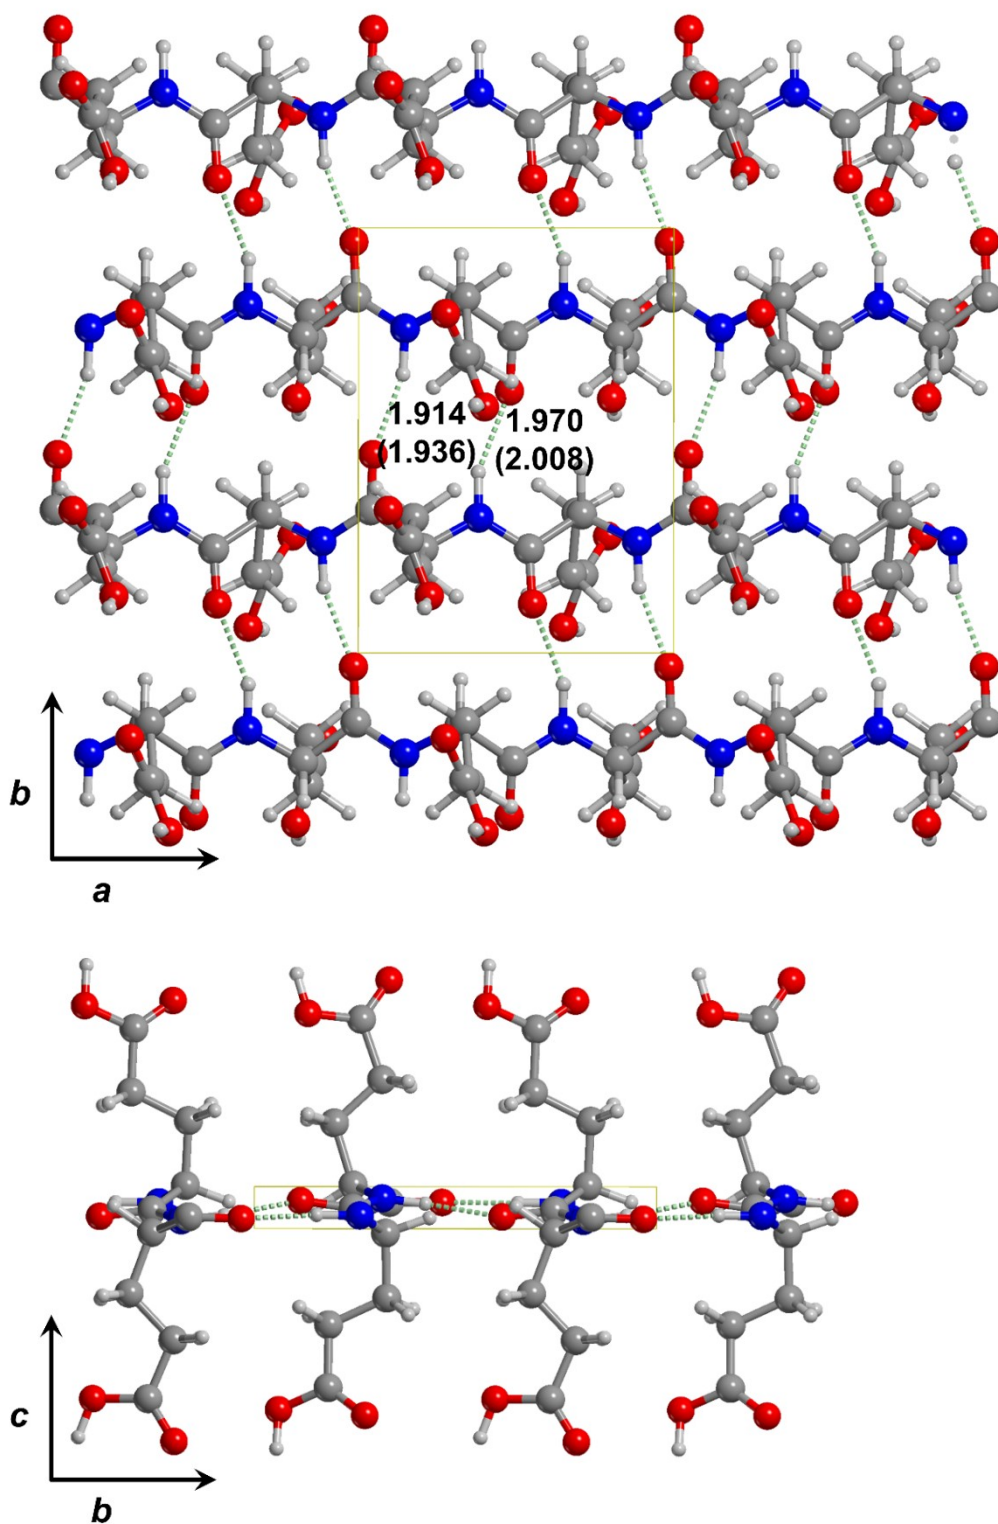

**Figure S11.** PBE-D2\* optimized geometry for the isolated periodic antiparallel polyglutamic acid  $\beta$ -sheet (GLU  $\beta$ -sheet<sub>AP</sub>). Bare values refer to distances for optimized structures in the gas phase, while the values in parenthesis are for those optimized with the PCM. The unit cell is represented in yellow. Bond distances are in Å. Hydrogen in white, carbon in grey, oxygen in red, nitrogen in blue.

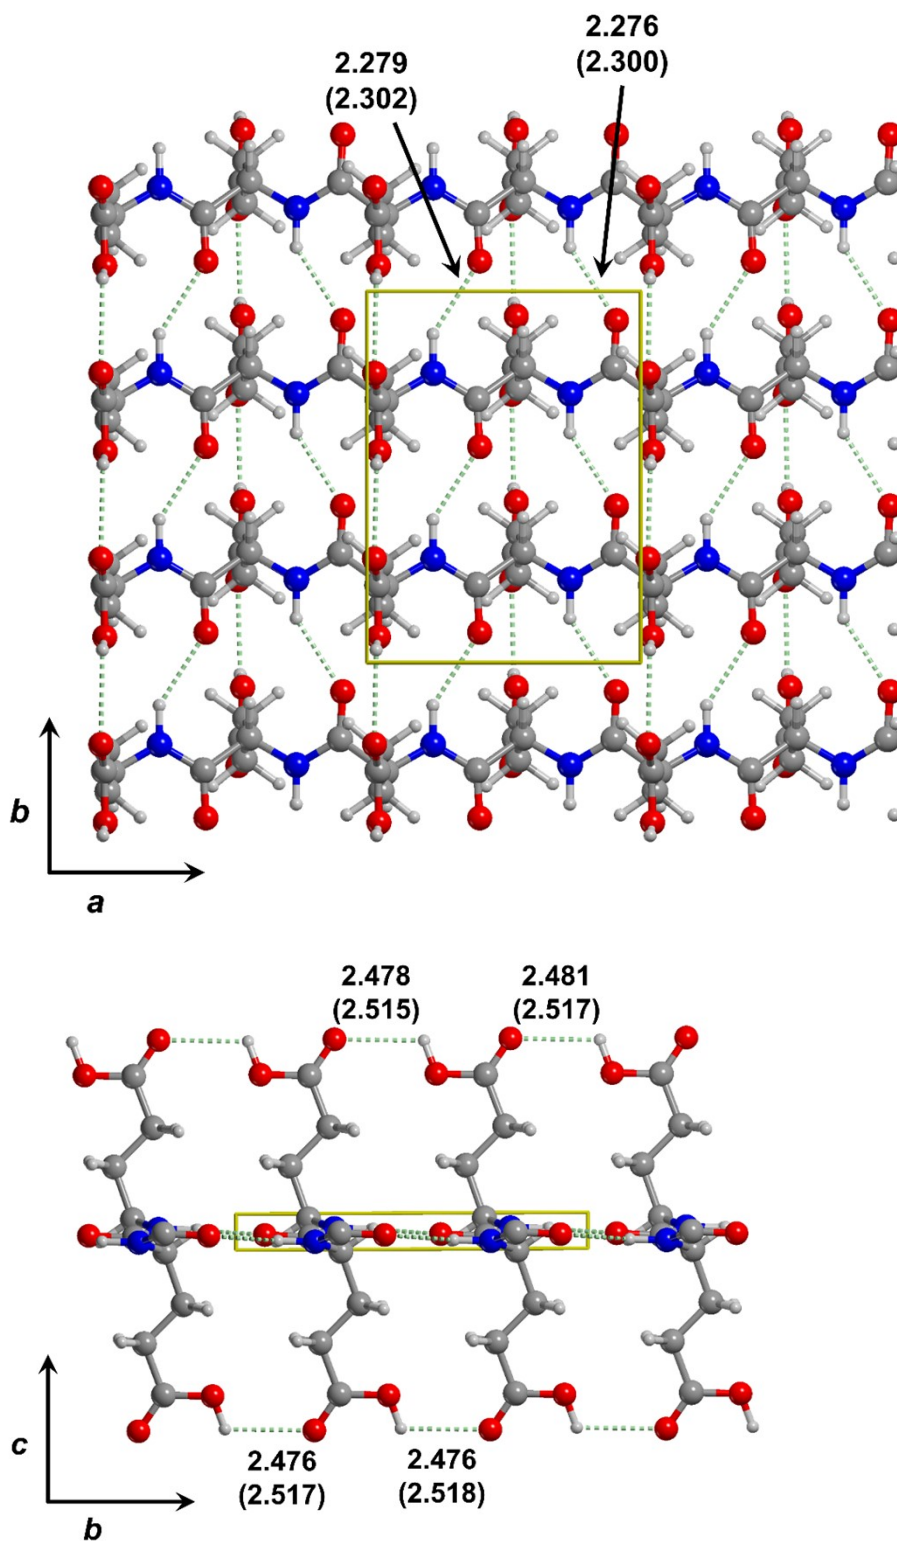

**Figure S12.** PBE-D2\* optimized geometry for the isolated periodic parallel polyglutamic acid  $\beta$ -sheet (GLU  $\beta$ -sheet\_P). Bare values refer to distances for optimized structures in the gas phase, while the values in parenthesis are for those optimized with the PCM. The unit cell is represented in yellow. Bond distances are in Å. Hydrogen in white, carbon in grey, oxygen in red, nitrogen in blue.

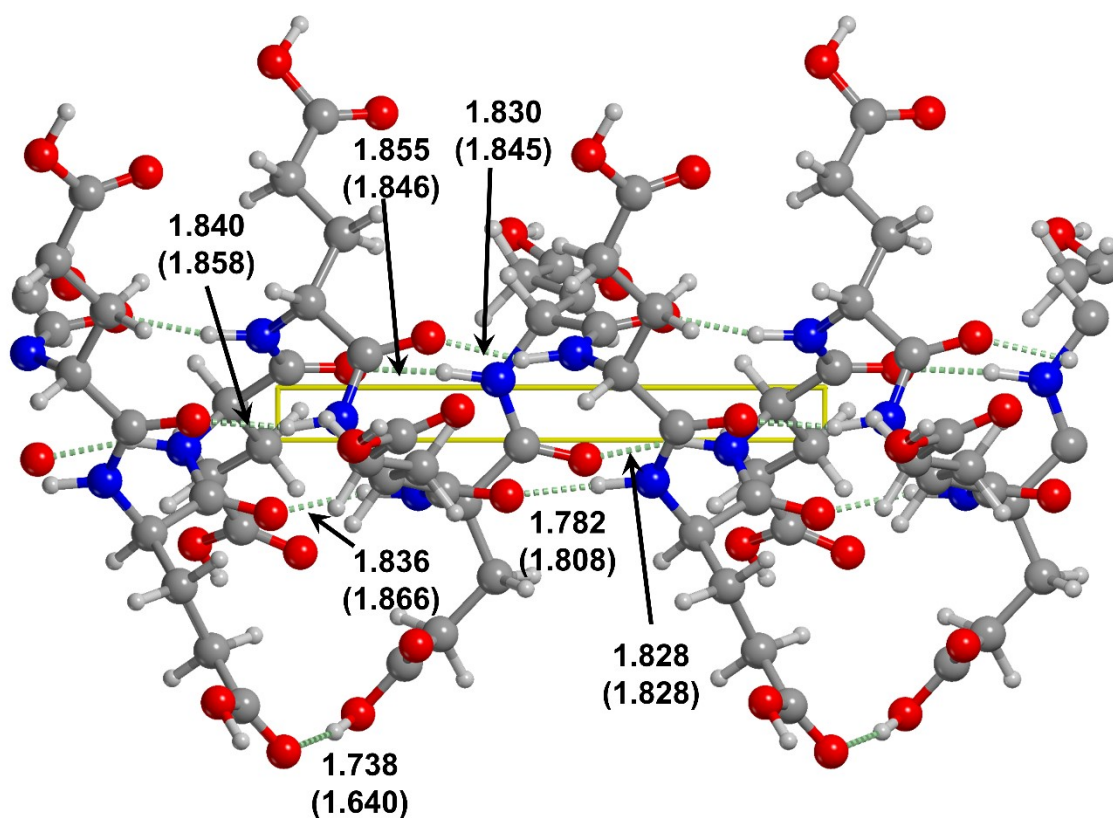

**Figure S13.** PBE-D2\* optimized geometry for the isolated periodic polyglutamic acid  $\alpha$ -helix (GLU\_ $\alpha$ -helix). Bare values refer to distances for optimized structures in the gas phase, while the values in parenthesis are for those optimized with the PCM. The unit cell is represented in yellow. Bond distances are in Å. Hydrogen in white, carbon in grey, oxygen in red, nitrogen in blue.

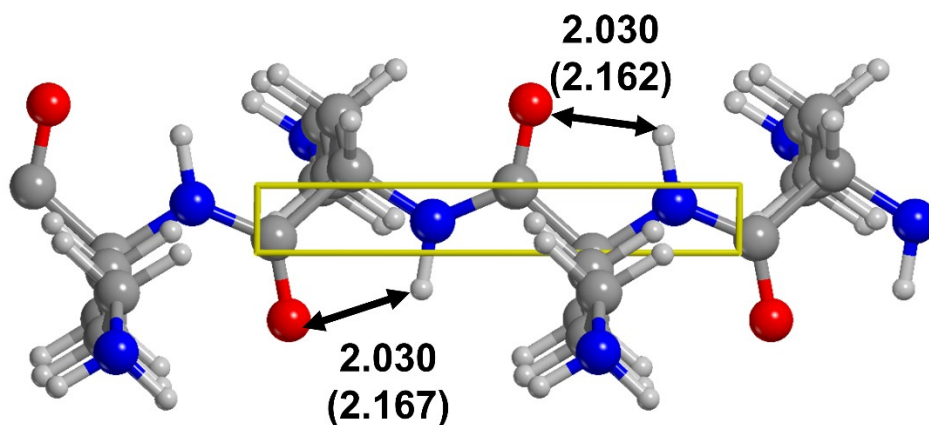

**Figure S18.** PBE-D2\* optimized geometry for the isolated periodic linear polylysine polymer (LYS\_linear). Bare values refer to distances for optimized structures in the gas phase, while the values in parenthesis are for those optimized with the PCM. The unit cell is represented in yellow. Bond distances are in Å. Hydrogen in white, carbon in grey, oxygen in red, nitrogen in blue.

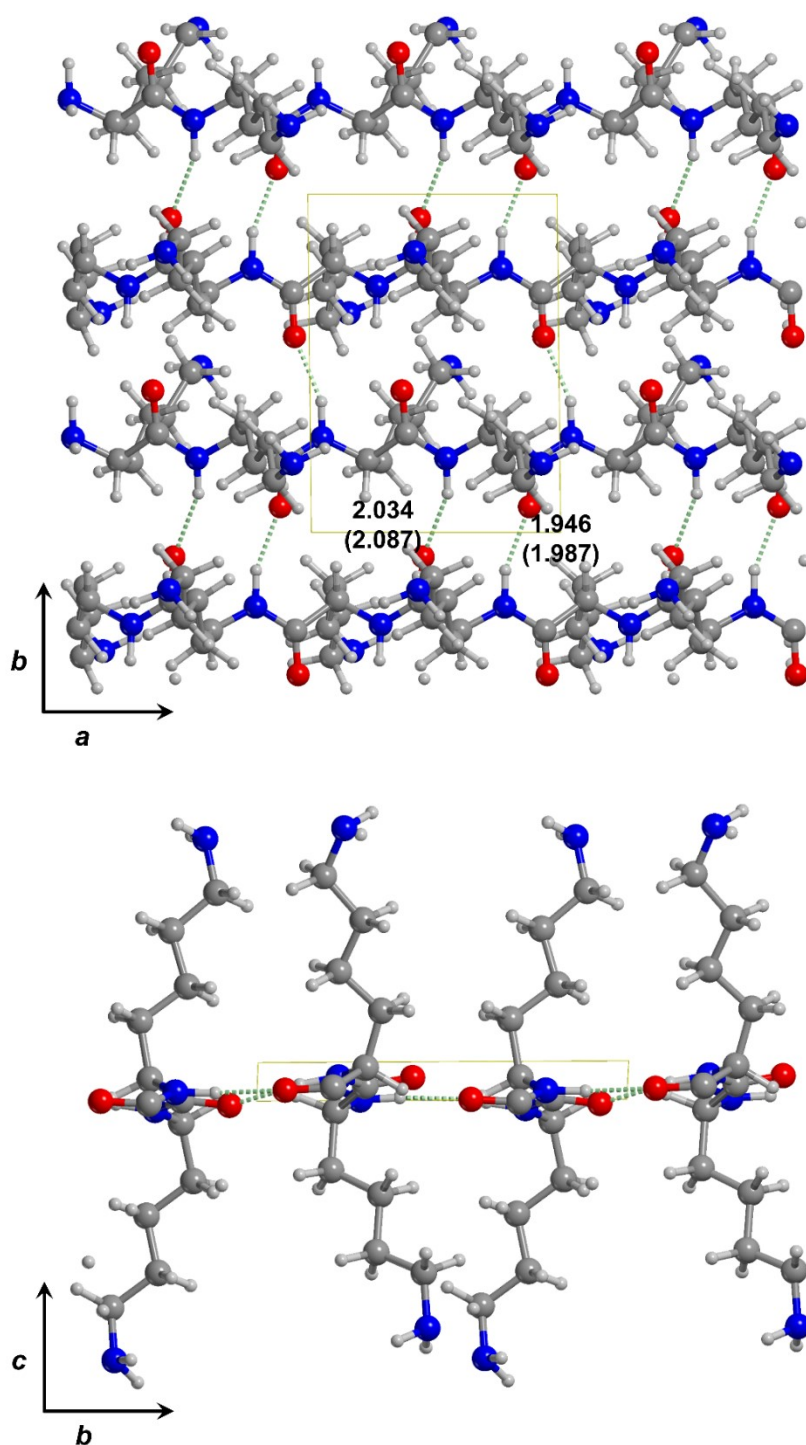

**Figure S19.** PBE-D2\* optimized geometry for the isolated periodic parallel antipolylysine  $\beta$ -sheet (LYS  $\beta$ -sheet\_P). Bare values refer to distances for optimized structures in the gas phase, while the values in parenthesis are for those optimized with the PCM. The unit cell is represented in yellow. Bond distances are in Å. Hydrogen in white, carbon in grey, oxygen in red, nitrogen in blue.

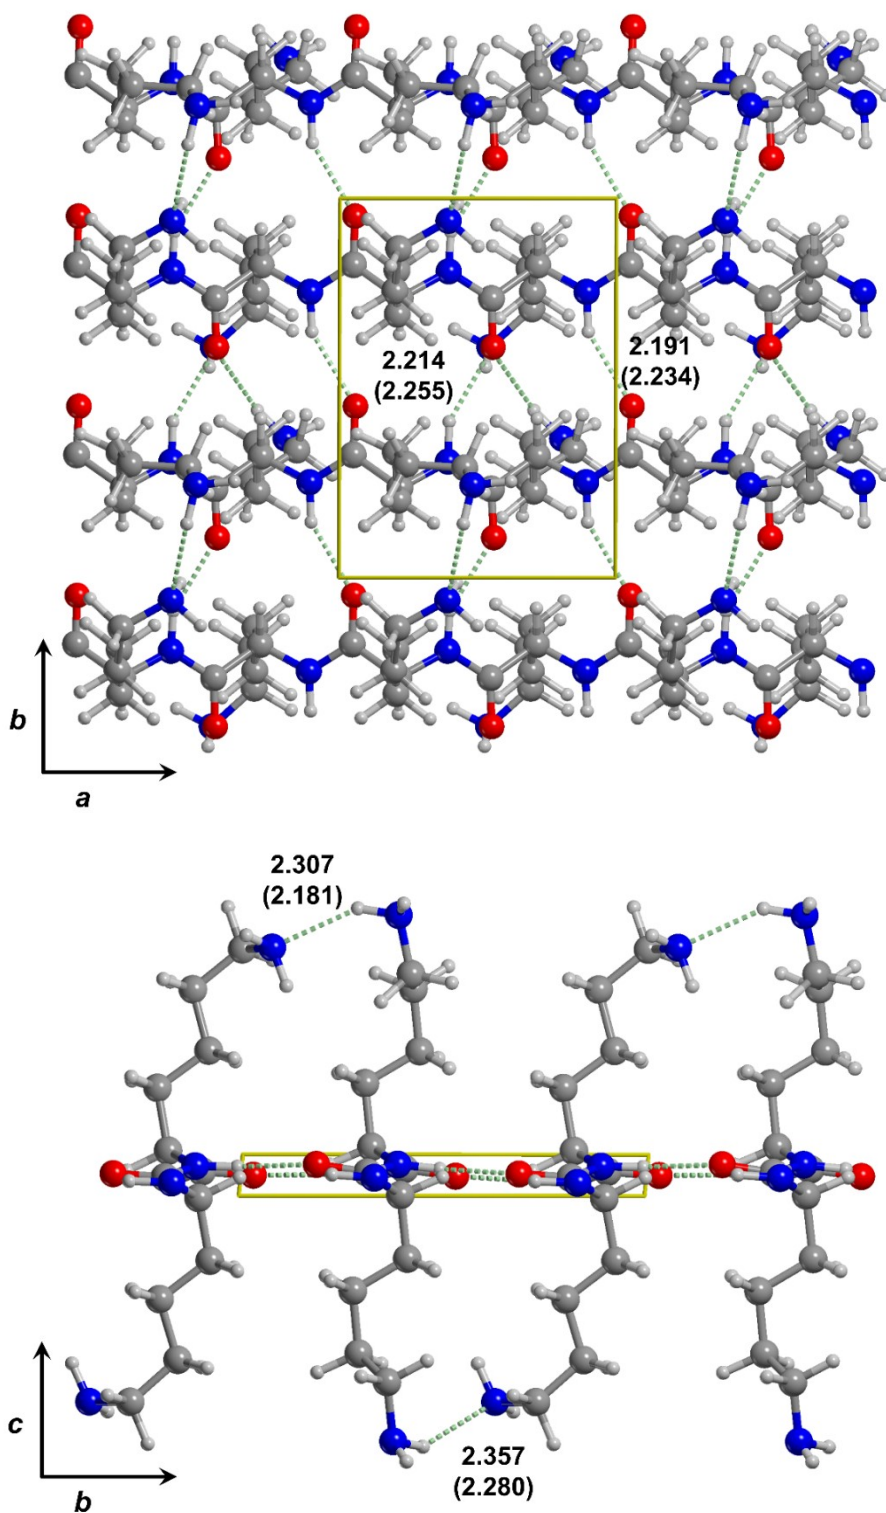

**Figure S20.** PBE-D2\* optimized geometry for the isolated periodic parallel polylysine  $\beta$ -sheet (LYS  $\beta$ -sheet\_P). Bare values refer to distances for optimized structures in the gas phase, while the values in parenthesis are for those optimized with the PCM. The unit cell is represented in yellow. Bond distances are in Å. Hydrogen in white, carbon in grey, oxygen in red, nitrogen in blue.

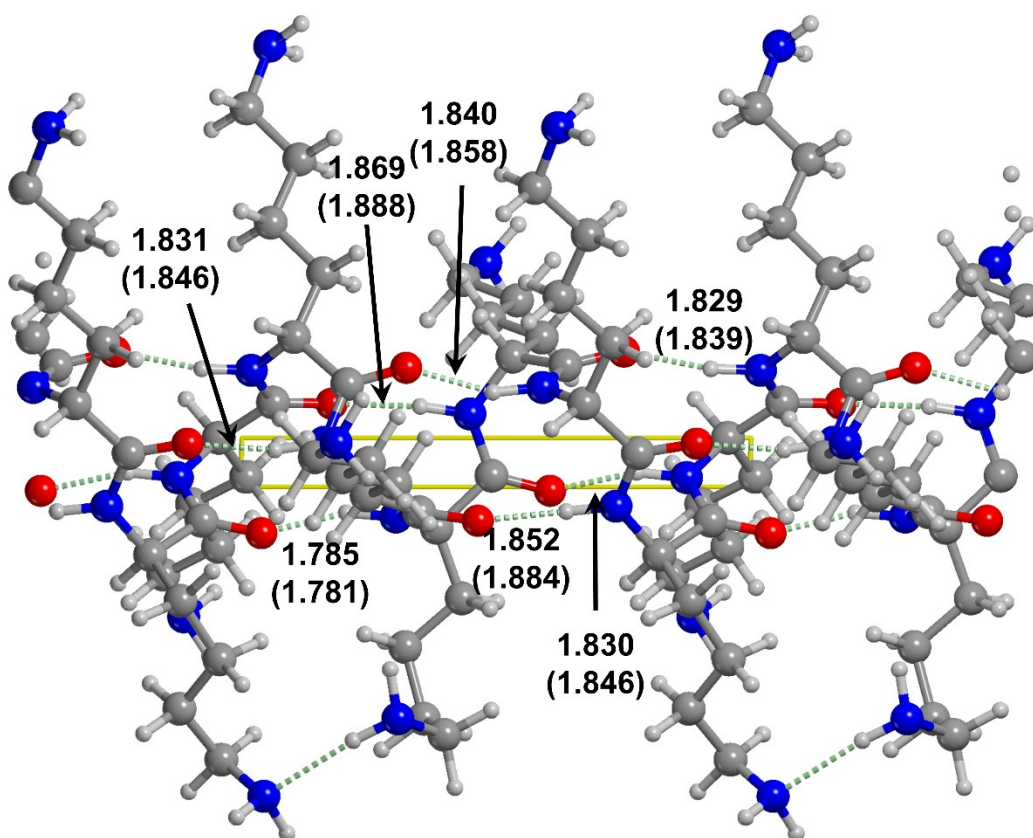

**Figure S21.** PBE-D2\* optimized geometry for the isolated periodic polylysine  $\alpha$ -helix. The unit cell is represented in yellow (LYS\_  $\alpha$ -helix). Bare values refer to distances for optimized structures in the gas phase, while the values in parenthesis are for those optimized with the PCM. Bond distances are in Å. Hydrogen in white, carbon in grey, oxygen in red, nitrogen in blue.



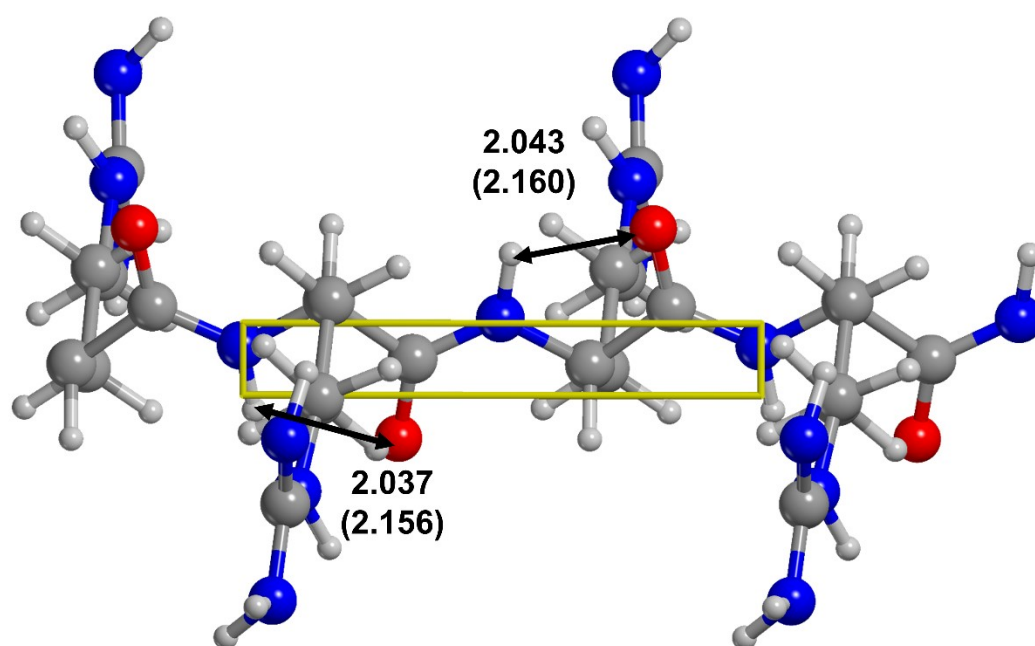

**Figure S14.** PBE-D2\* optimized geometry for the isolated periodic linear polyarginine polymer (ARG\_linear). Bare values refer to distances for optimized structures in the gas phase, while the values in parenthesis are for those optimized with the PCM. The unit cell is represented in yellow. Bond distances are in Å. Hydrogen in white, carbon in grey, oxygen in red, nitrogen in blue.

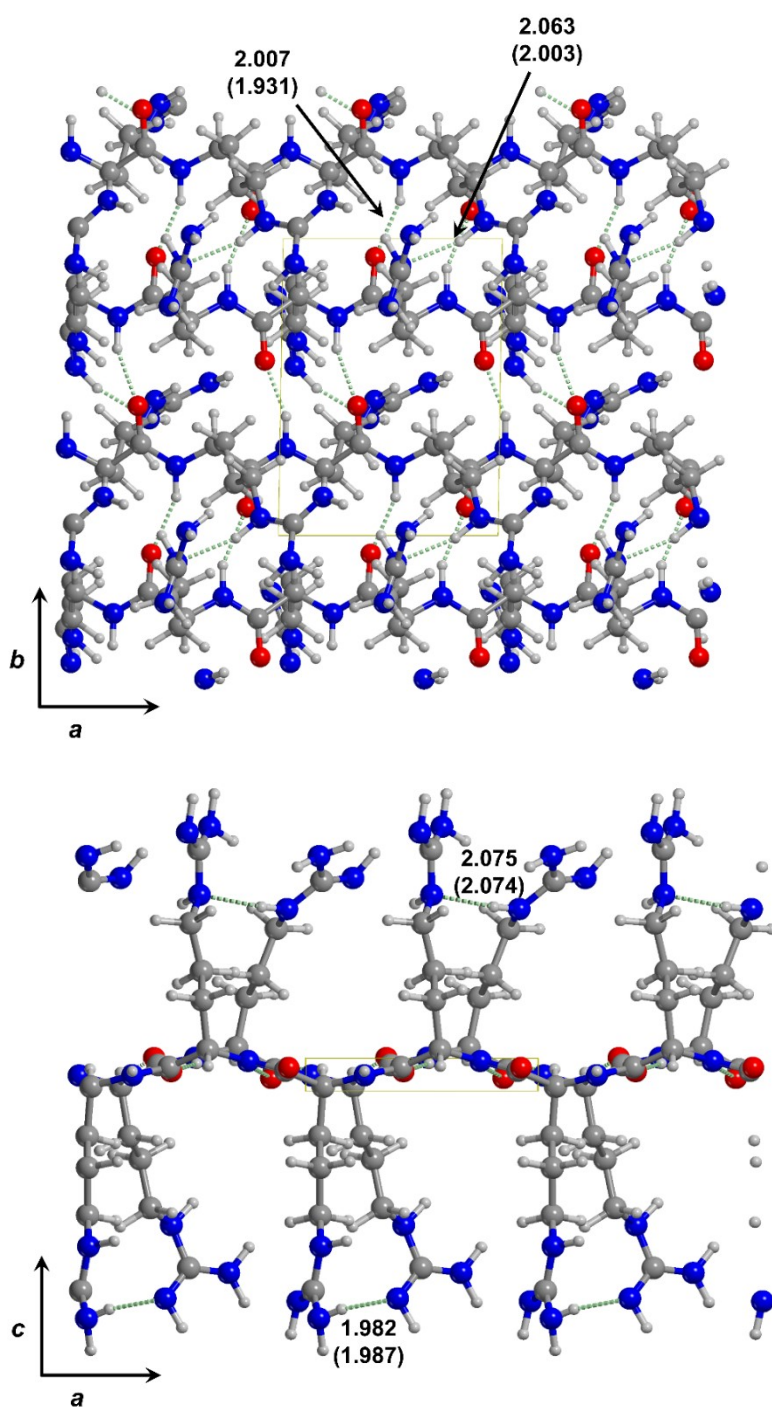

**Figure S15.** PBE-D2\* optimized geometry for the isolated periodic antiparallel polyarginine  $\beta$ -sheet (ARG\_ $\beta$ -sheet\_AP). Bare values refer to distances for optimized structures in the gas phase, while the values in parenthesis are for those optimized with the PCM. The unit cell is represented in yellow. Bond distances are in Å. Hydrogen in white, carbon in grey, oxygen in red, nitrogen in blue.

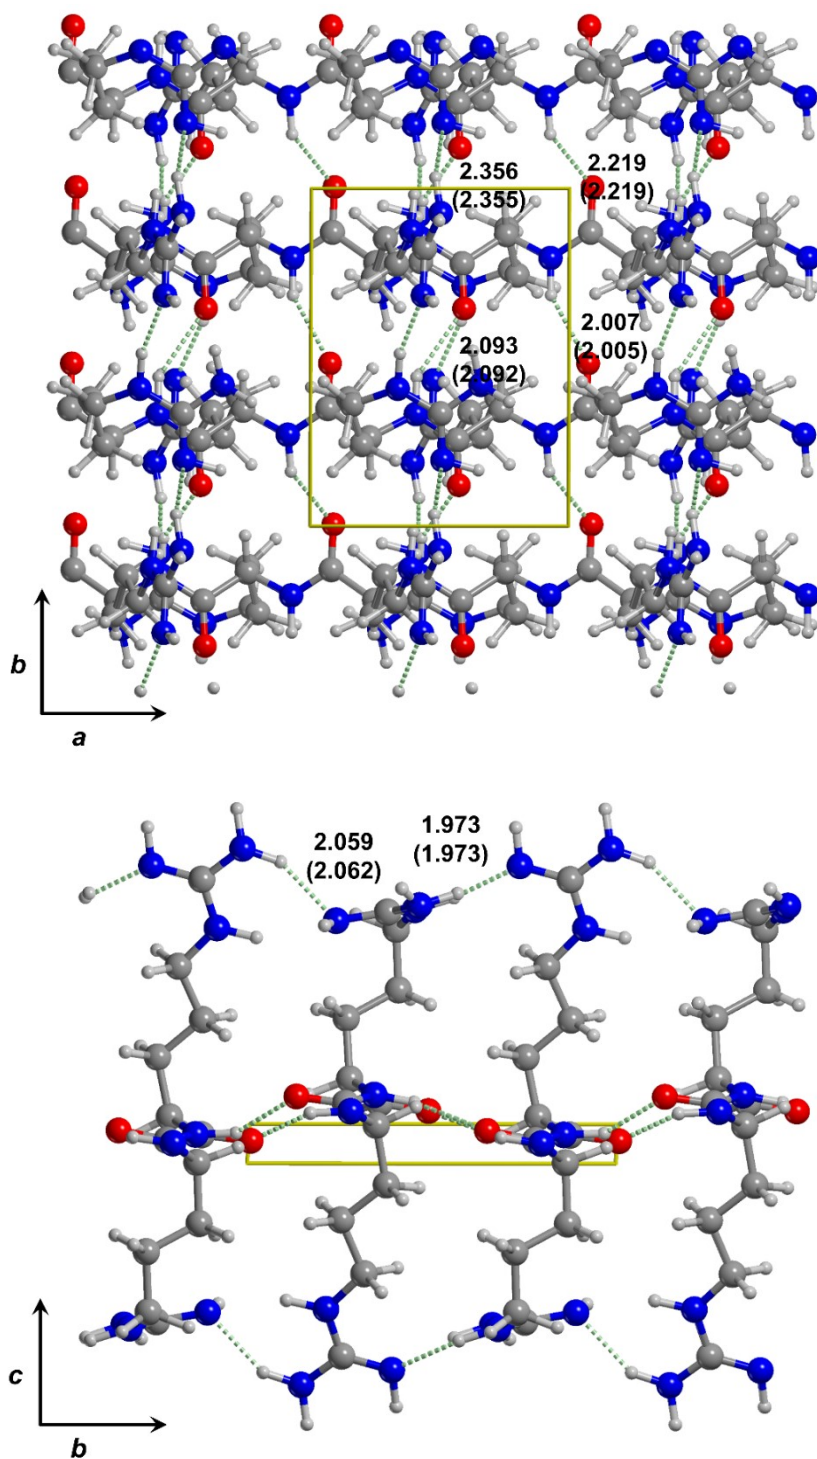

**Figure S16.** PBE-D2\* optimized geometry for the isolated periodic parallel polyarginine  $\beta$ -sheet (ARG\_ $\beta$ -sheet\_P). Bare values refer to distances for optimized structures in the gas phase, while the values in parenthesis are for those optimized with the PCM. The unit cell is represented in yellow. Bond distances are in Å. Hydrogen in white, carbon in grey, oxygen in red, nitrogen in blue.

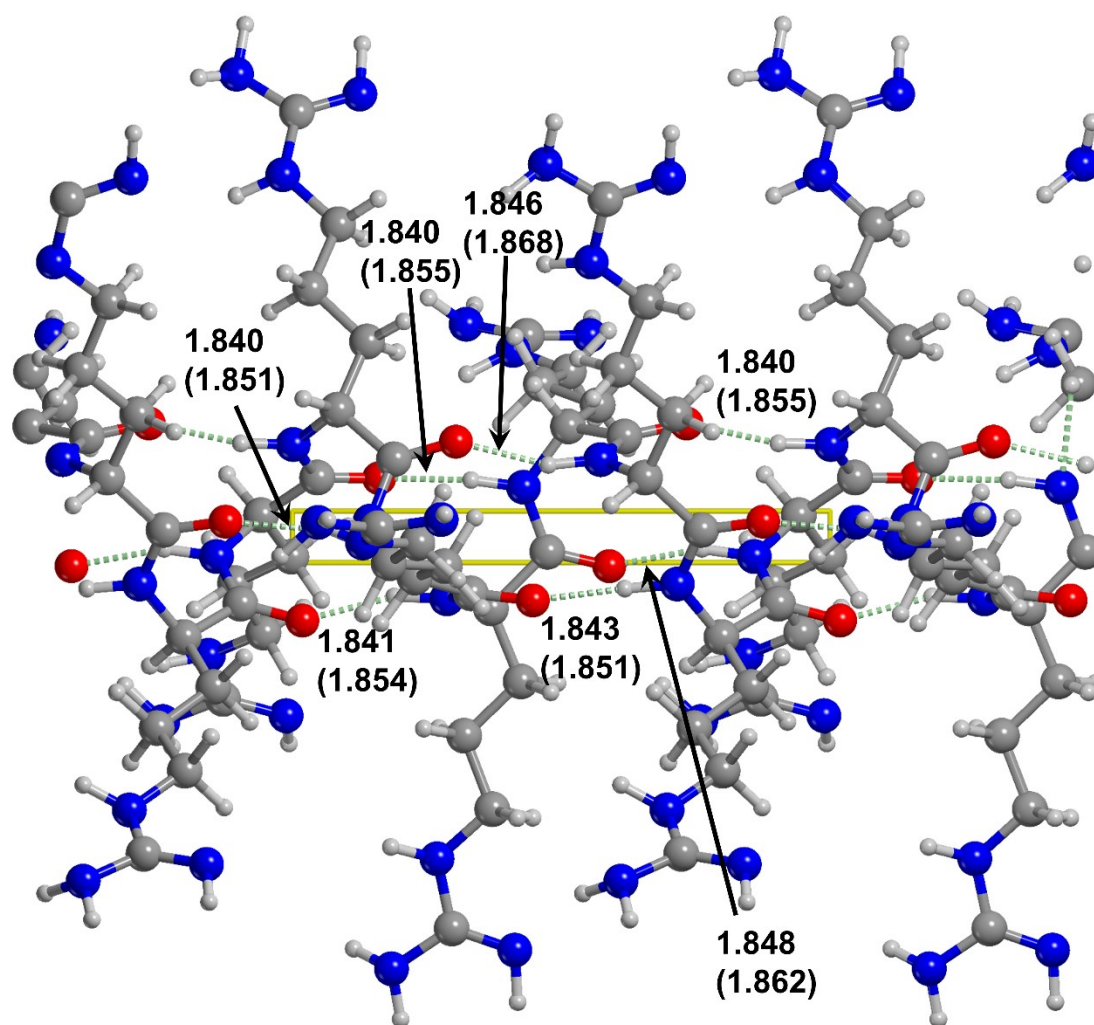

**Figure S17.** PBE-D2\* optimized geometry for the isolated periodic polyarginine  $\alpha$ -helix (ARG\_ $\alpha$ -helix). Bare values refer to distances for optimized structures in the gas phase, while the values in parenthesis are for those optimized with the PCM. The unit cell is represented in yellow. Bond distances are in Å. Hydrogen in white, carbon in grey, oxygen in red, nitrogen in blue.

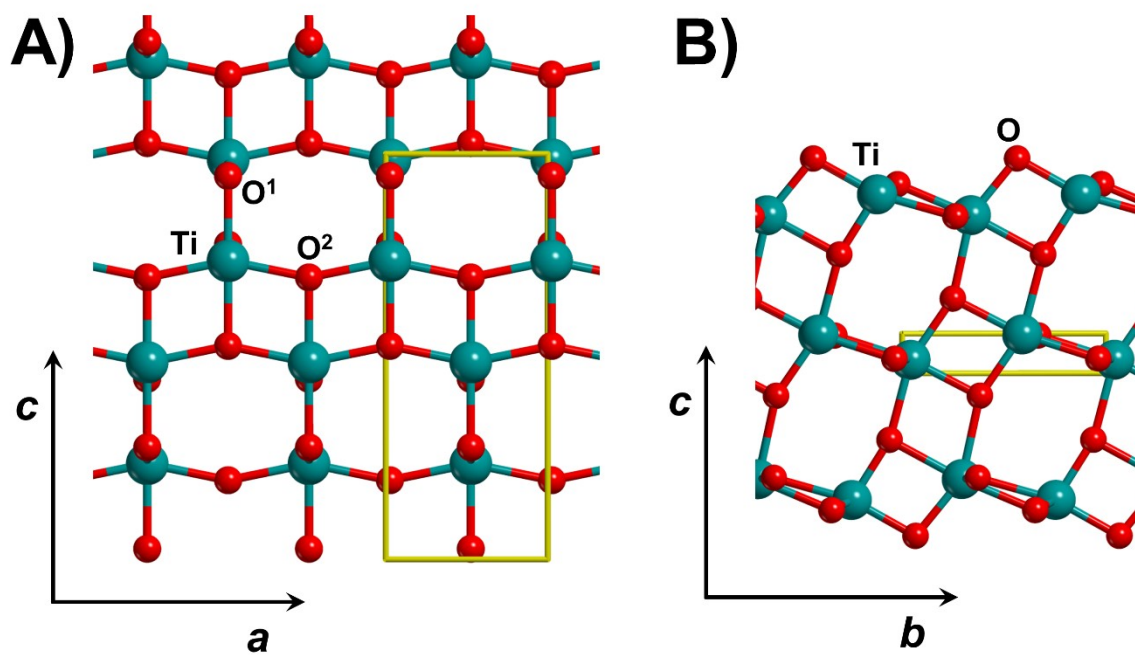

**Figure S18.** PBE-D2\* optimized structure of: A) bulk anatase, and B) the (101) anatase surface viewed along the  $a$  direction.

A) GLY\_linear/TiO<sub>2</sub>

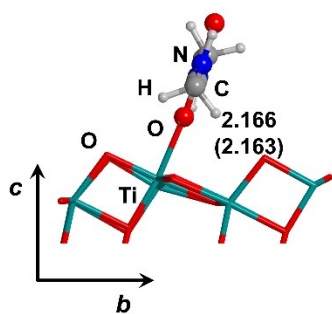

B) GLY\_β-sheet\_AP/TiO<sub>2</sub>

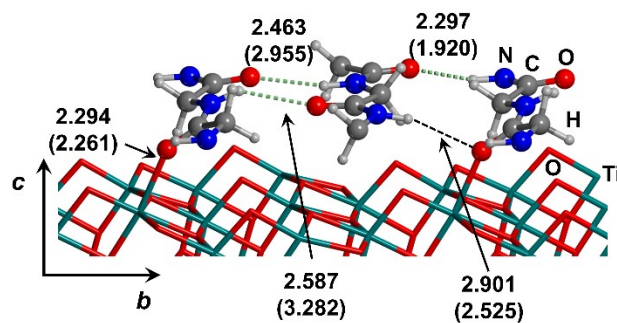

C) GLY\_β-sheet\_P/TiO<sub>2</sub>

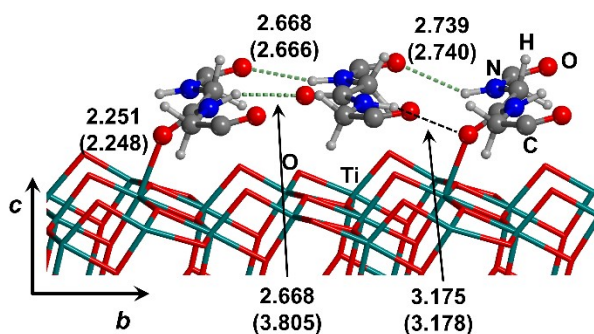

D) GLY\_α-helix\_2/TiO<sub>2</sub>

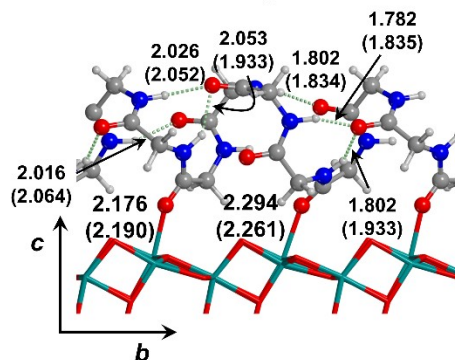

**Figure S19.** PBE-D2\* optimized structures of extended polyglycine (A), antiparallel (B) and parallel polyglycine β-sheets, and polyglycine α-helix (D) adsorbed on the TiO<sub>2</sub> (101) anatase surface. Numbers in parenthesis refers to values in gas phase, while number without parenthesis refers to values with implicit solvation.

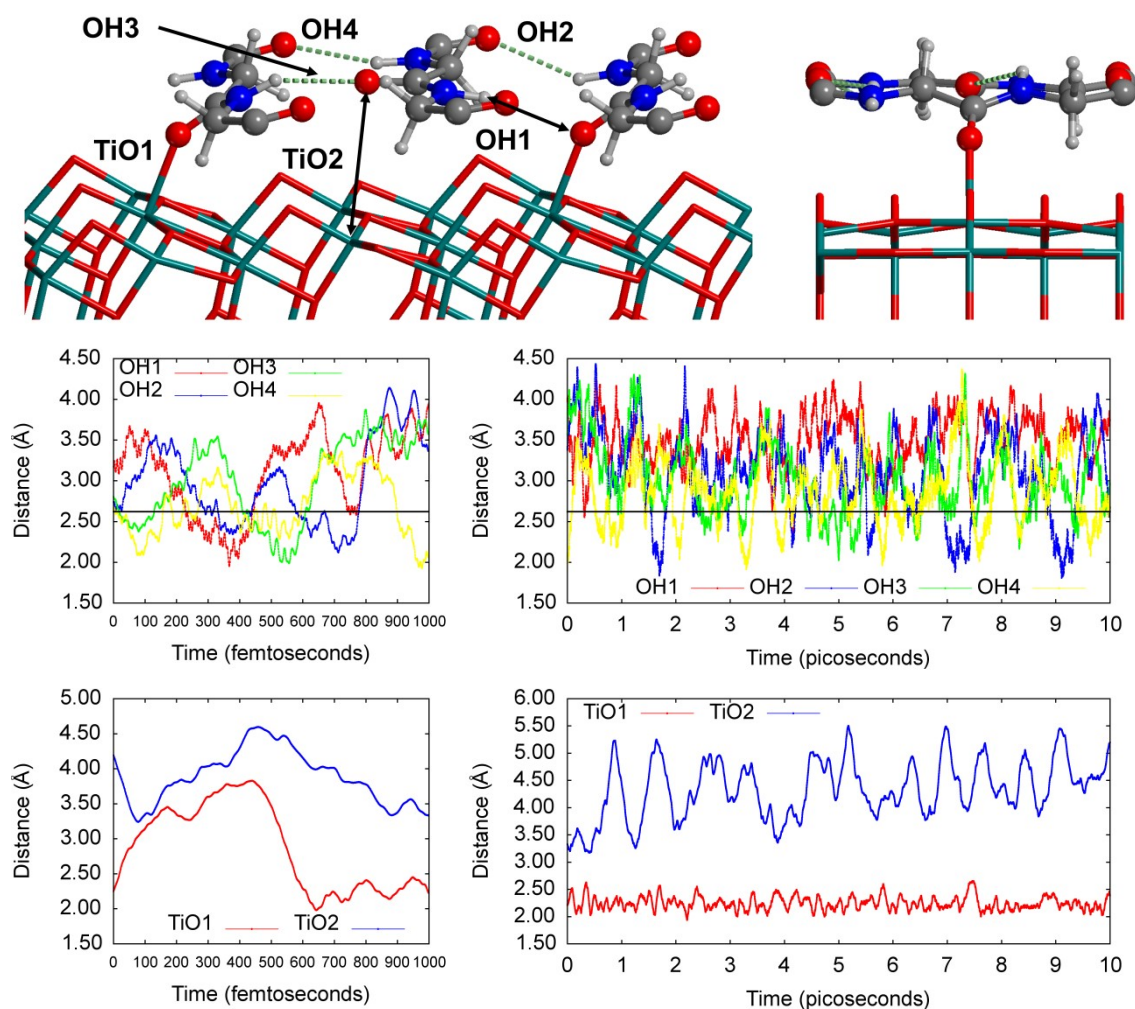

**Figure S20.** PBE-D2\* optimized geometry for the  $\beta$ -sheets\_P/TiO<sub>2</sub> (top). Evolution of the H-bond pattern (middle) and of Ti—O distances (bottom) during the MD simulation in both its equilibration (left part) and production (right part) period. Hydrogen in white, carbon in grey, oxygen in red, nitrogen in blue, titanium in cyan.

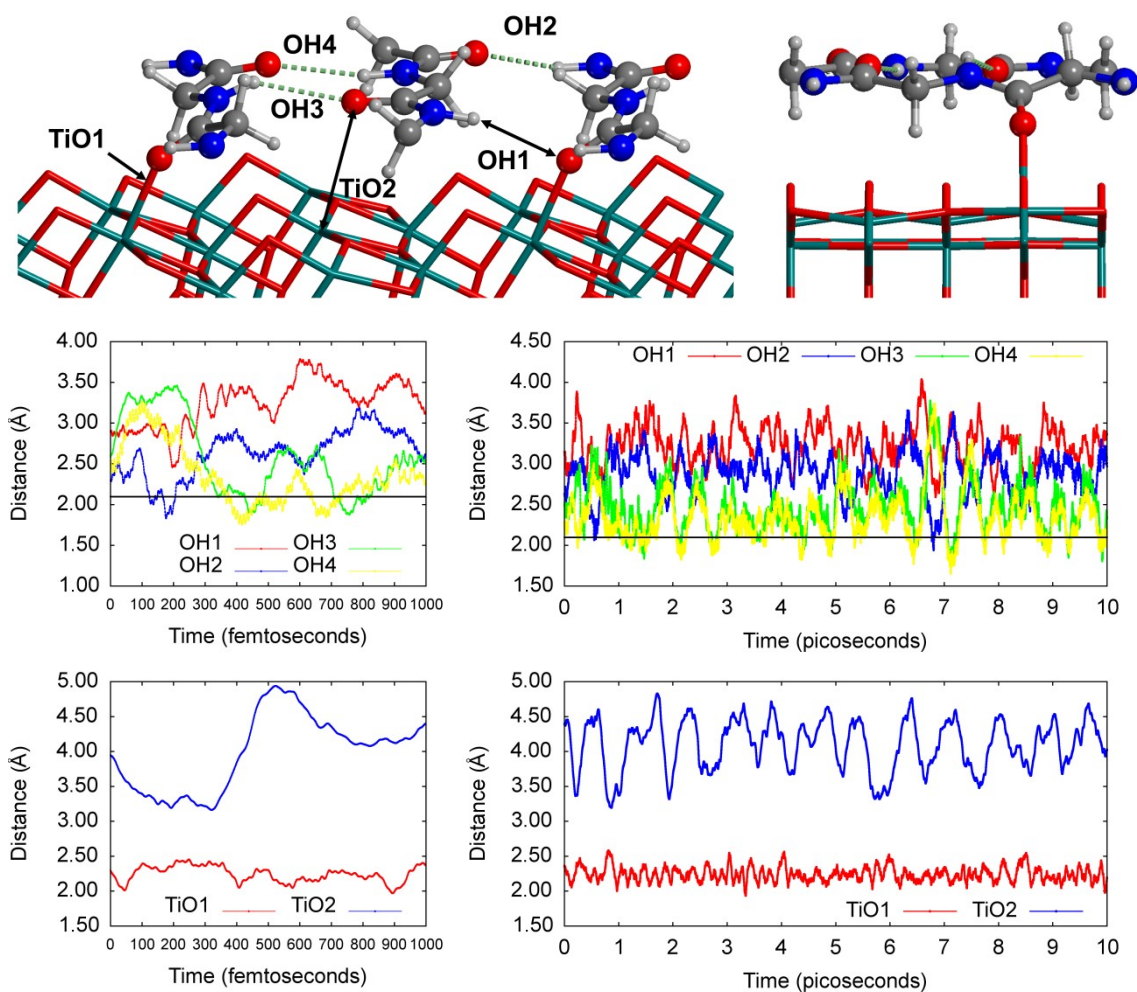

**Figure S21.** PBE-D2\* optimized geometry for the  $\beta$ -sheets<sub>AP</sub>/TiO<sub>2</sub> complex (top). Evolution of the H-bond pattern (middle) and of Ti—O distances (bottom) during the MD simulation in both its equilibration (left part) and production (right part) period. Hydrogen in white, carbon in grey, oxygen in red, nitrogen in blue, titanium in cyan.



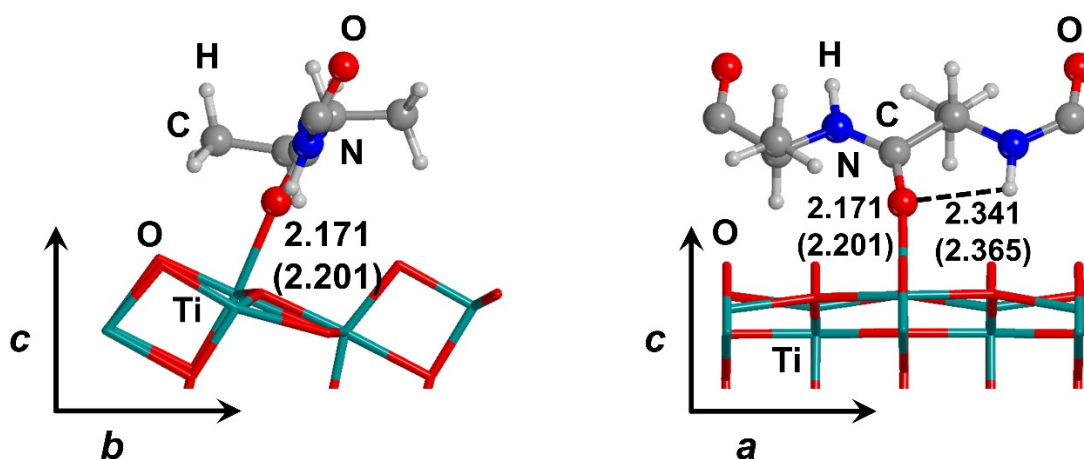

**Figure S22.** PBE-D2\* optimized structure of the ALA\_linear/TiO<sub>2</sub> complex. Bond distances are in Å. Bare values refer to distances for optimized structures in the gas phase, while the values in parenthesis are for those optimized with the PCM.

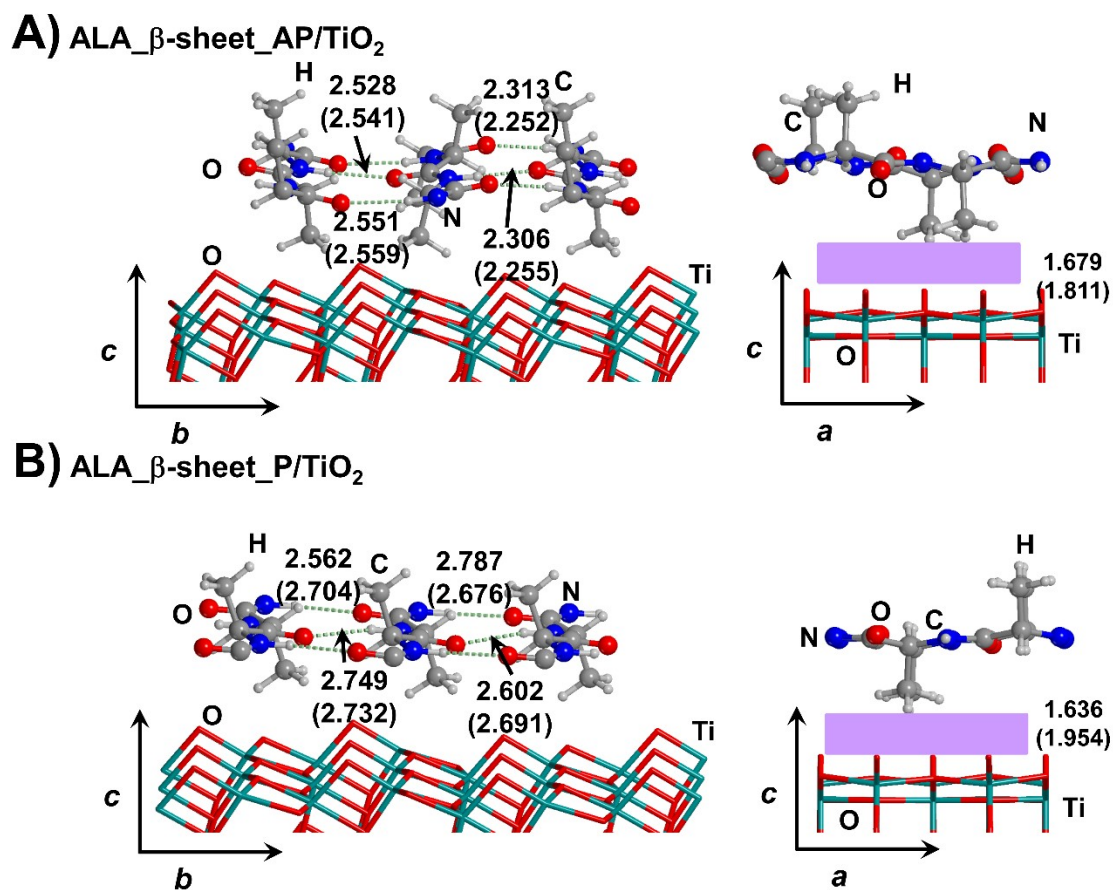

**Figure S23.** PBE-D2\* optimized structures of the ALA $_{\beta}$ -sheet $_{AP}$ /TiO $_2$  (A) and ALA $_{\beta}$ -sheet $_P$ /TiO $_2$  (B) complexes. Bond distances are in Å. Bare values refer to distances for optimized structures in the gas phase, while the values in parenthesis are for those optimized with the PCM.

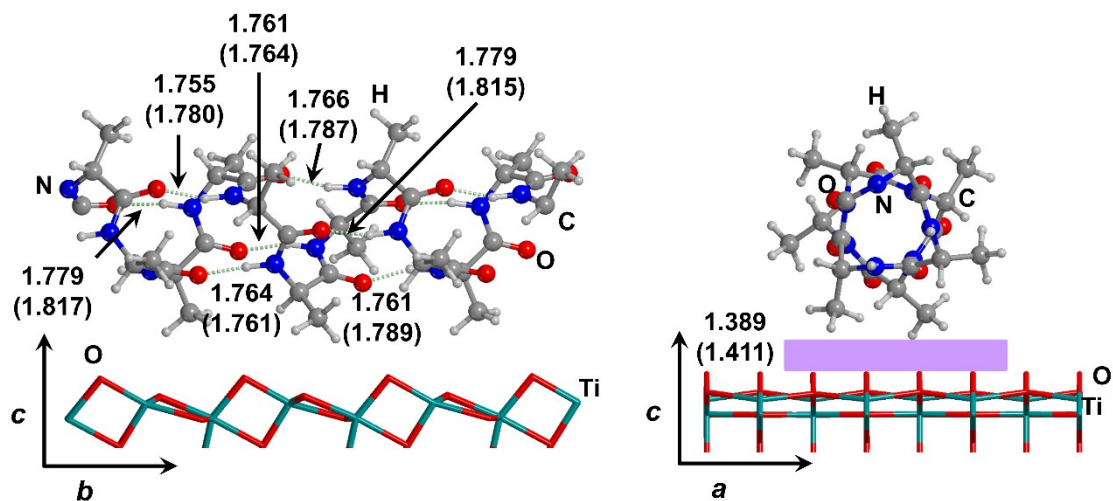

**Figure S24.** PBE-D2\* optimized structure of the ALA\_α-helix/TiO<sub>2</sub> complex. Bond distances are in Å. Bare values refer to distances for optimized structures in the gas phase, while the values in parenthesis are for those optimized with the PCM.

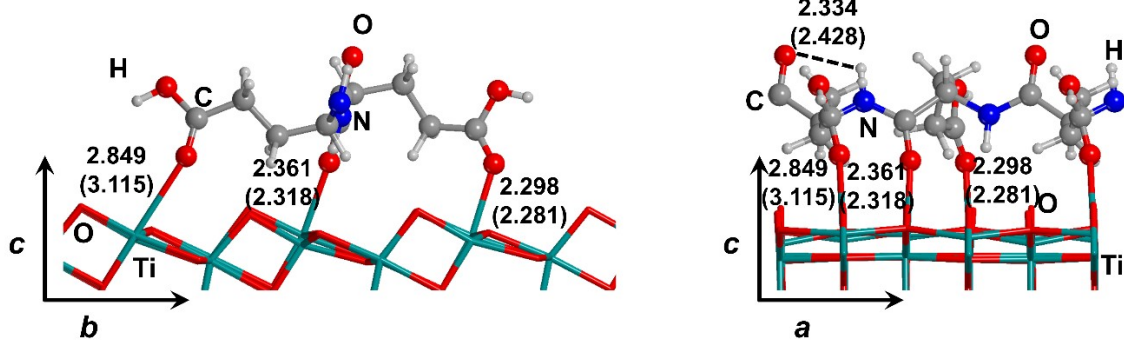

**Figure S25.** PBE-D2\* optimized structure of the GLU\_linear/TiO<sub>2</sub> complex. Bond distances are in Å. Bare values refer to distances for optimized structures in the gas phase, while the values in parenthesis are for those optimized with the PCM.

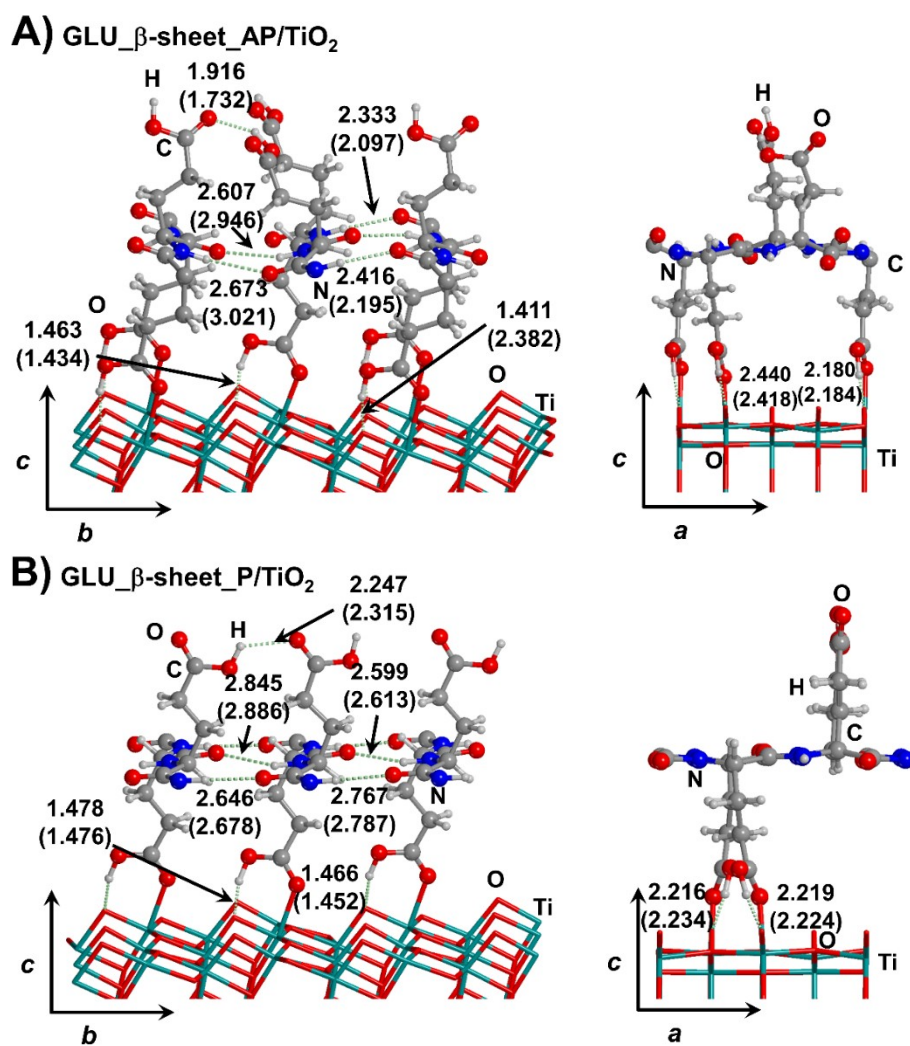

**Figure S26.** PBE-D2\* optimized structures of the GLU $\beta$ -sheet $\text{AP}/\text{TiO}_2$  (A) and GLU $\beta$ -sheet $\text{P}/\text{TiO}_2$  (B) complexes. Bond distances are in Å. Bare values refer to distances for optimized structures in the gas phase, while the values in parenthesis are for those optimized with the PCM.

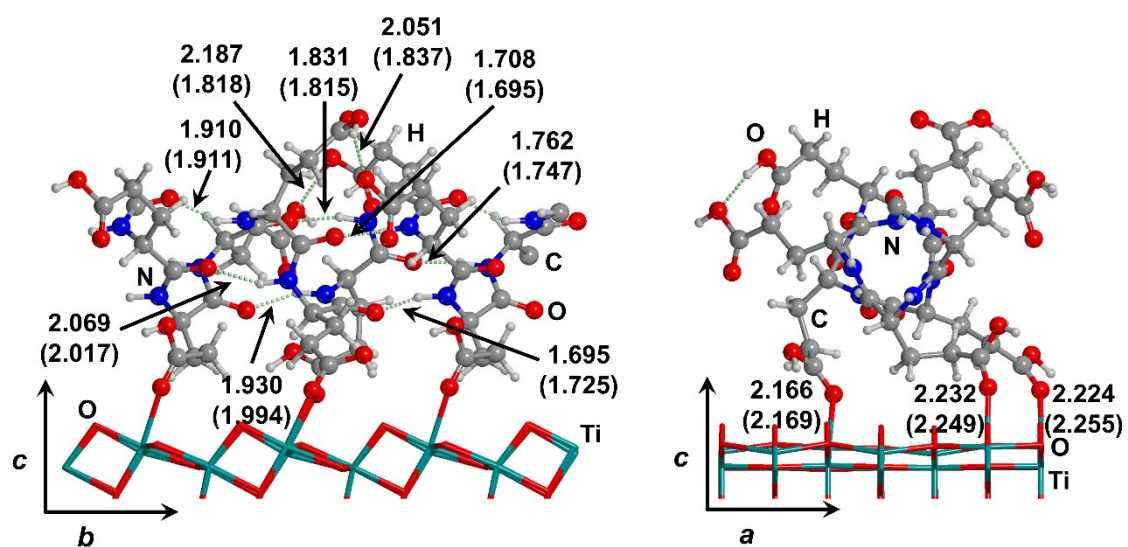

**Figure S27.** PBE-D2\* optimized structure of the GLU\_α-helix/TiO<sub>2</sub> complex. Bond distances are in Å. Bare values refer to distances for optimized structures in the gas phase, while the values in parenthesis are for those optimized with the PCM.

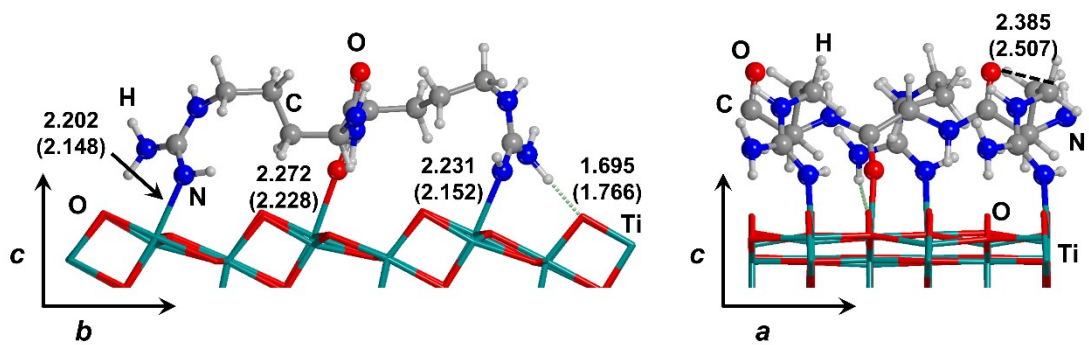

**Figure S28.** PBE-D2\* optimized structure of the ARG\_linear/TiO<sub>2</sub> complex. Bond distances are in Å. Bare values refer to distances for optimized structures in the gas phase, while the values in parenthesis are for those optimized with the PCM.

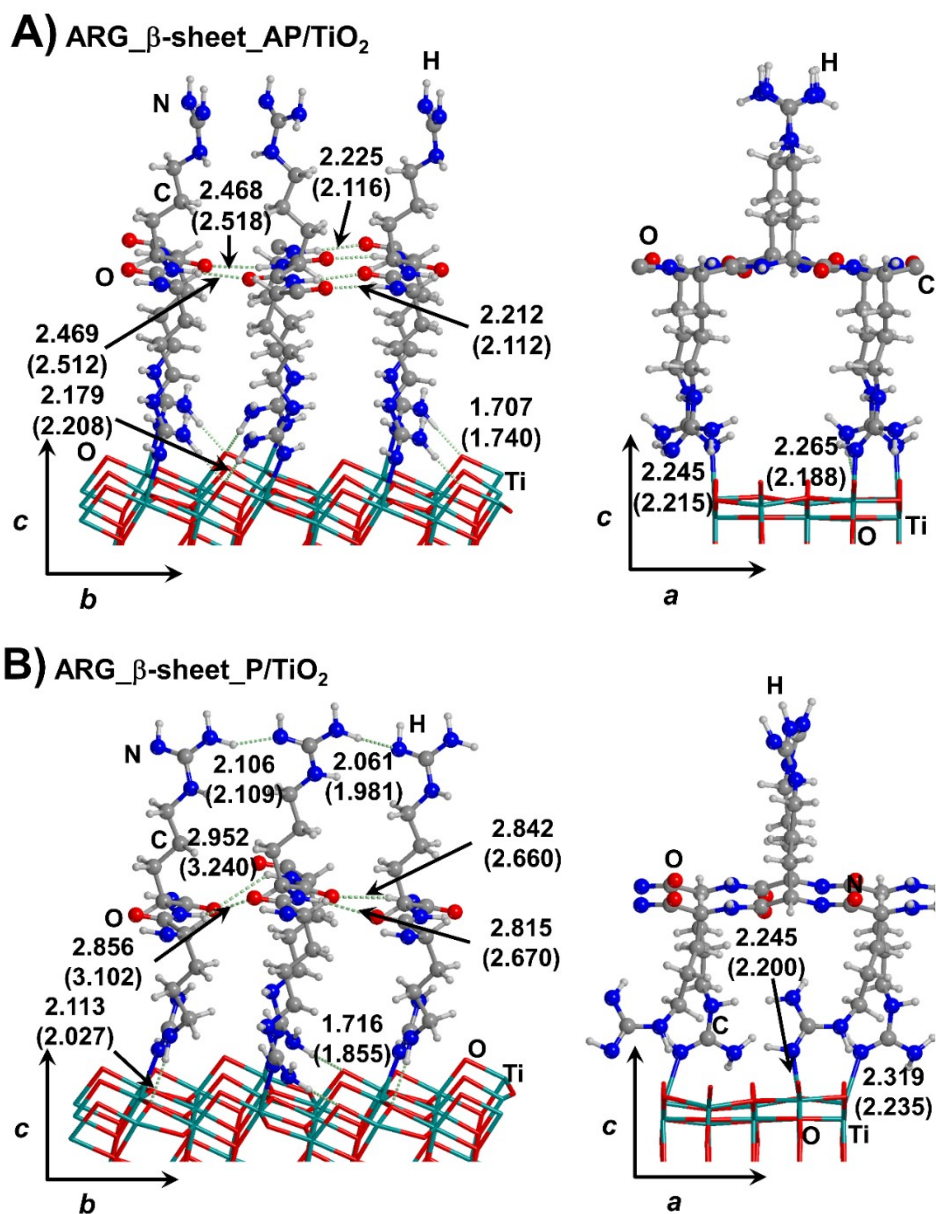

**Figure S29.** PBE-D2\* optimized structures of the ARG\_β-sheet\_AP/TiO<sub>2</sub> (A) and ARG\_β-sheet\_P/TiO<sub>2</sub> (B) complexes. Bond distances are in Å. Bare values refer to distances for optimized structures in the gas phase, while the values in parenthesis are for those optimized with the PCM.



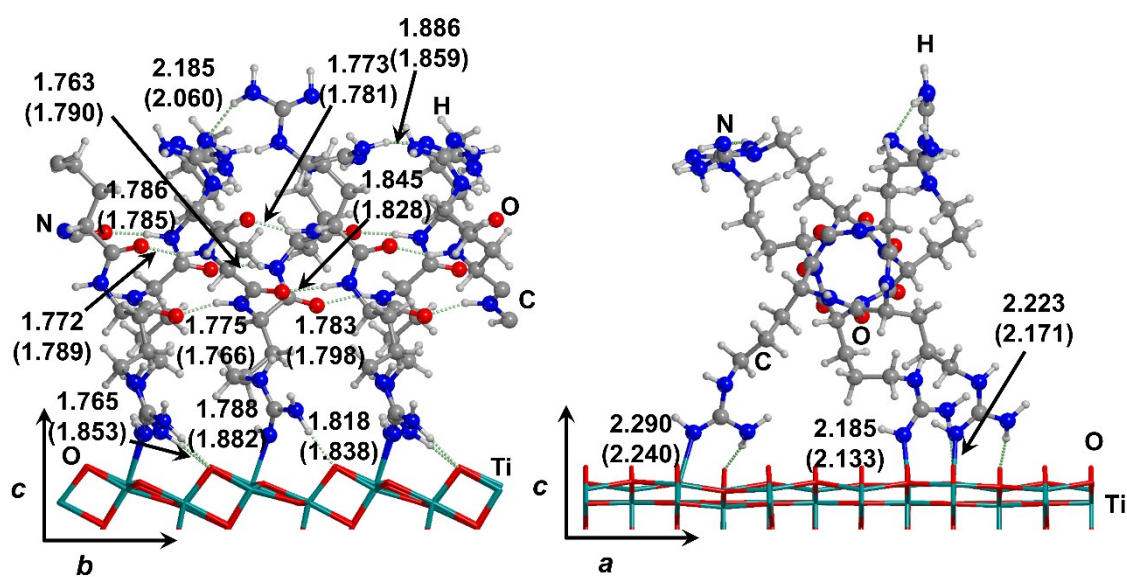

**Figure S30.** PBE-D2\* optimized structure of the ARG\_α-helix/TiO<sub>2</sub> complex. Bond distances are in Å. Bare values refer to distances for optimized structures in the gas phase, while the values in parenthesis are for those optimized with the PCM.

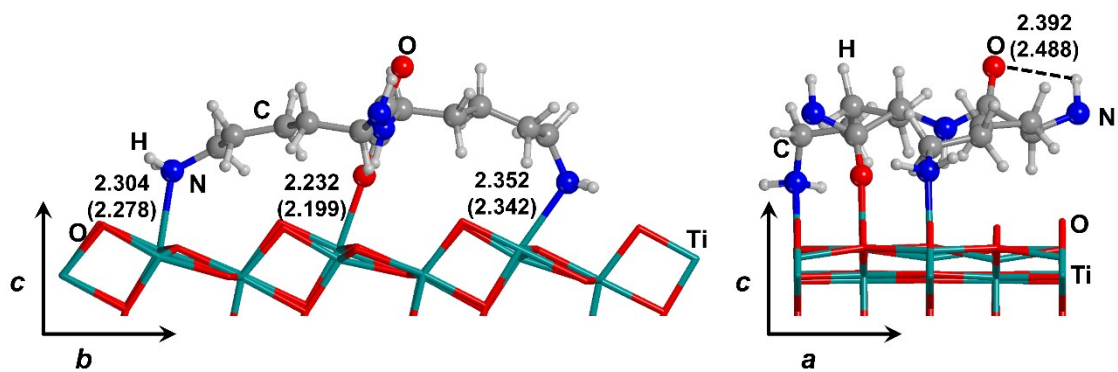

**Figure S31.** PBE-D2\* optimized structure of the LYS\_linear/TiO<sub>2</sub> complex. Bond distances are in Å. Bare values refer to distances for optimized structures in the gas phase, while the values in parenthesis are for those optimized with the PCM.

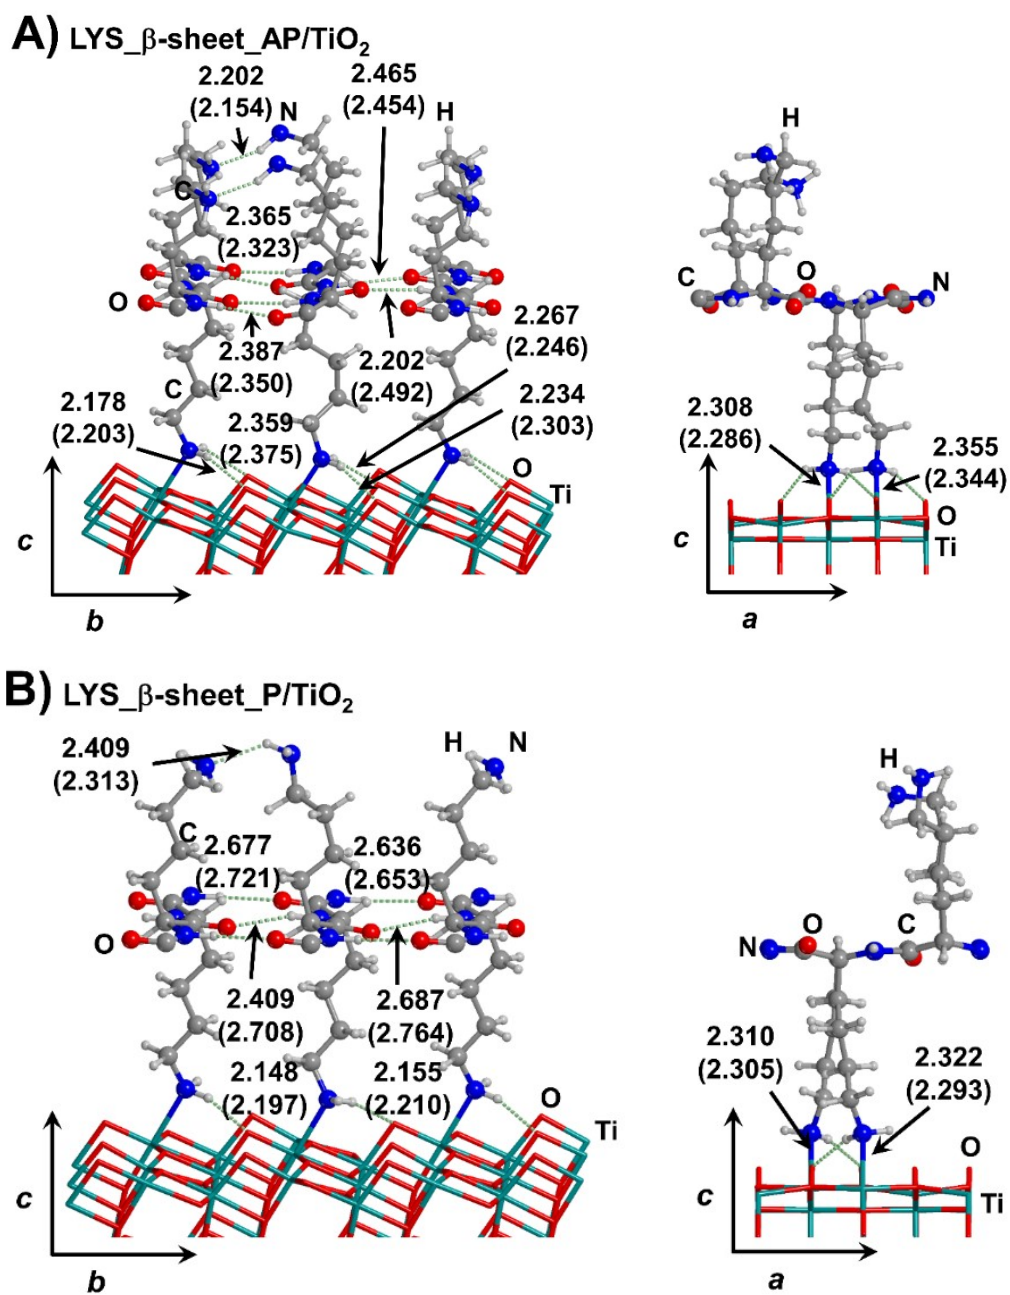

**Figure S32.** PBE-D2\* optimized structures of the LYS<sub>β</sub>-sheet<sub>AP</sub>/TiO<sub>2</sub> (A) and LYS<sub>β</sub>-sheet<sub>P</sub>/TiO<sub>2</sub> (B) complexes. Bond distances are in Å. Bare values refer to distances for optimized structures in the gas phase, while the values in parenthesis are for those optimized with the PCM.

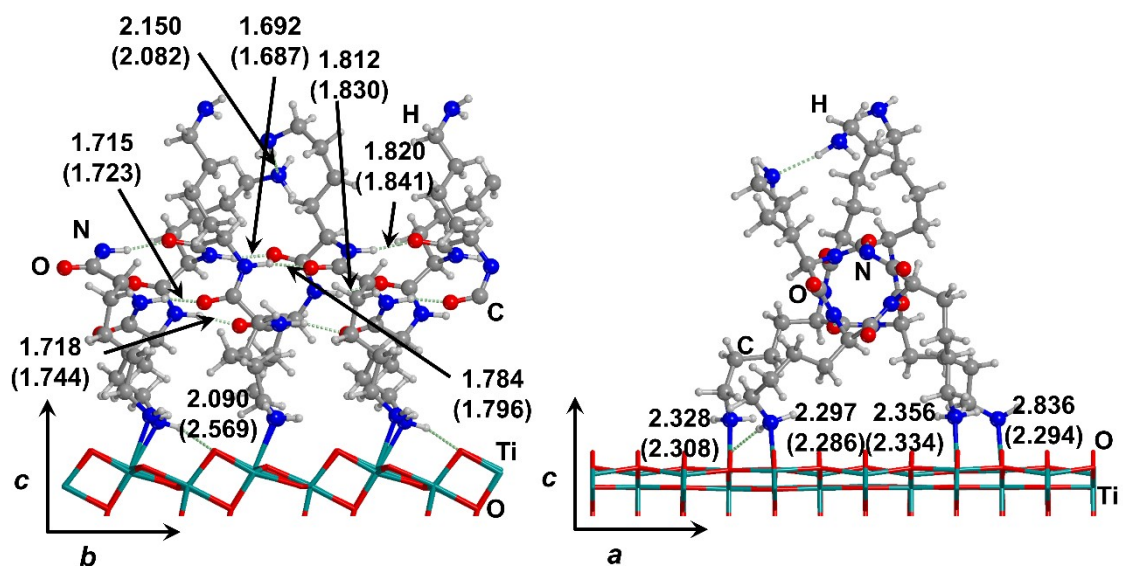

**Figure S33.** PBE-D2\* optimized structure of the LYS<sub>α</sub>-helix/TiO<sub>2</sub> complex. Bond distances are in Å. Bare values refer to distances for optimized structures in the gas phase, while the values in parenthesis are for those optimized with the PCM.

## H-bond analysis

In the following, a detailed H-bond analysis will be presented, highlighting the differences between the polyamino acidic systems in the gas and adsorbed on the TiO<sub>2</sub> (101) anatase surface.

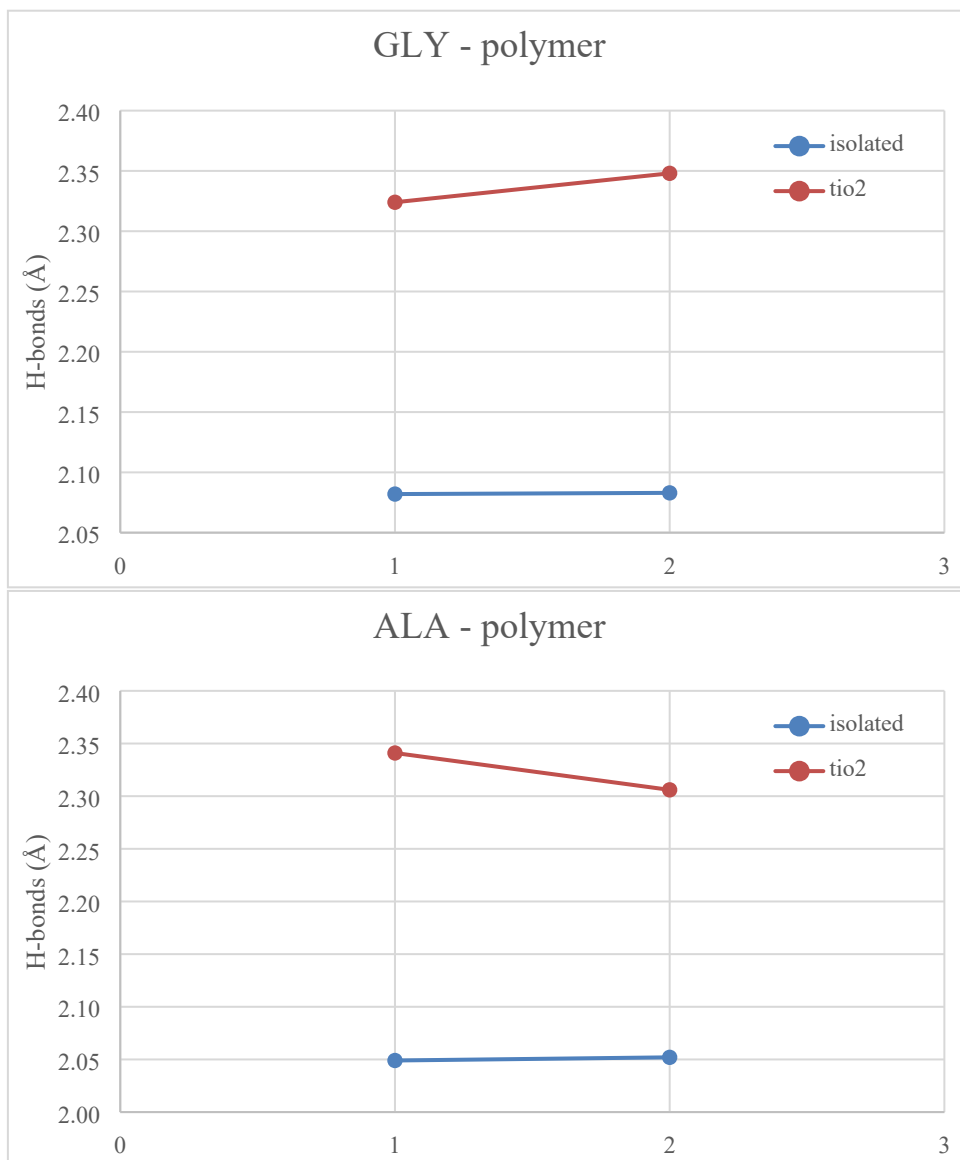

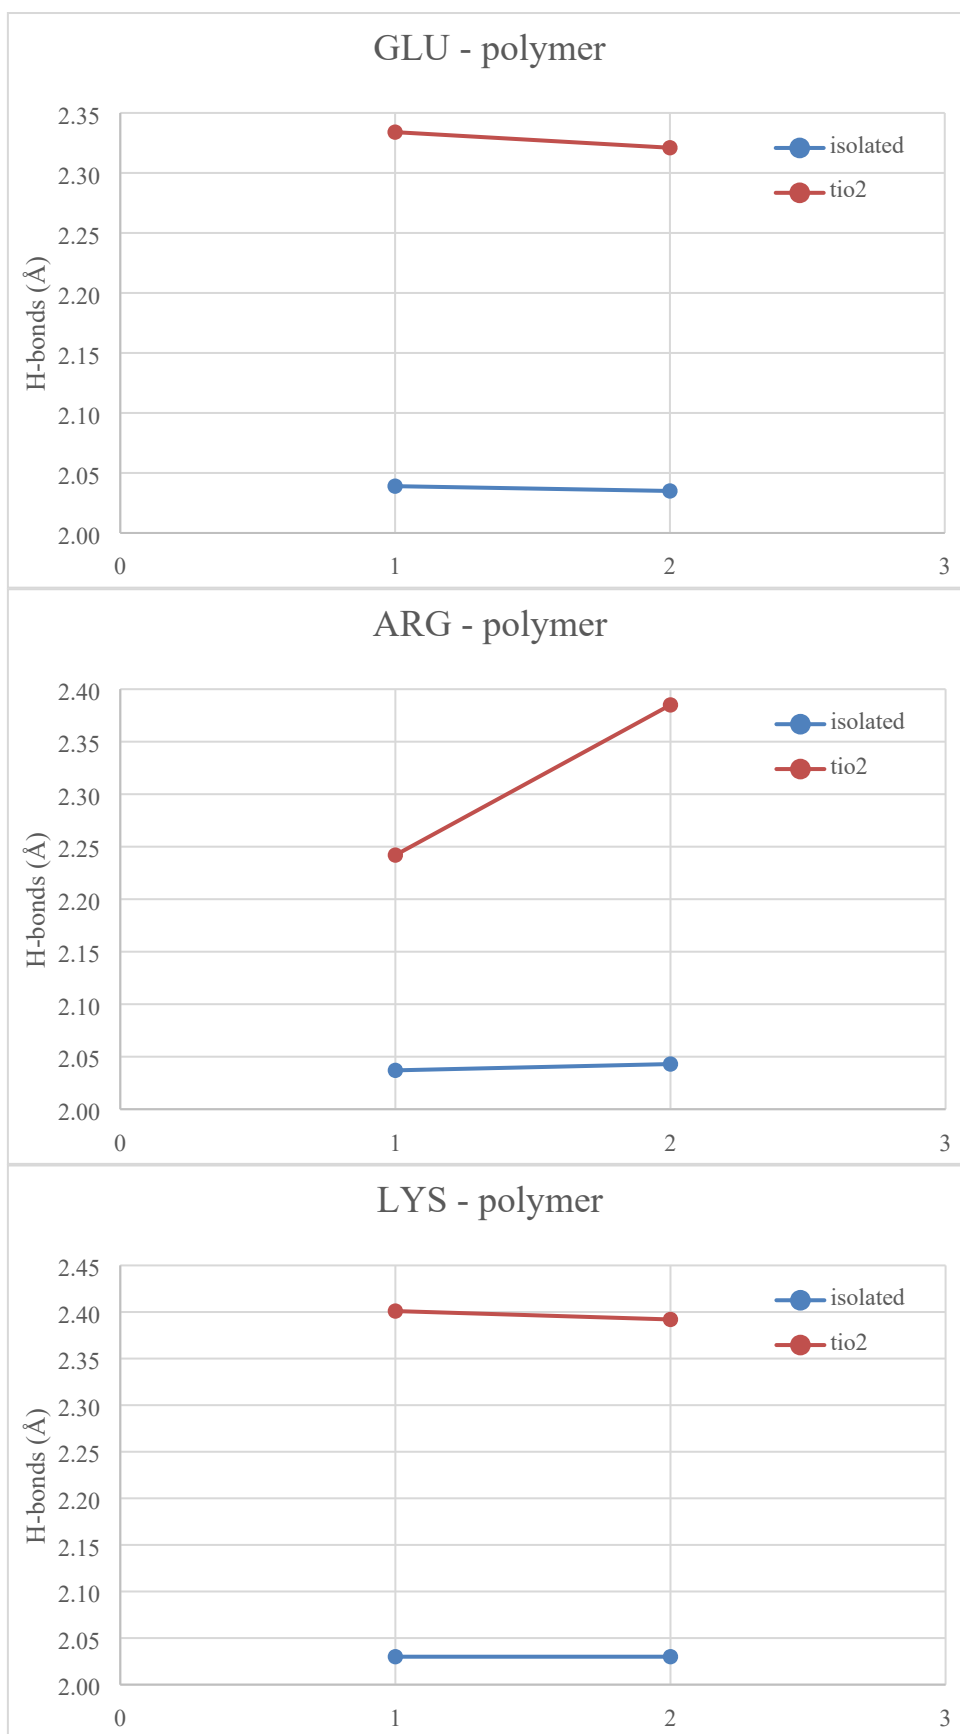

**Figure S34.** Comparison of the intrastrand (pseudo-) H-bonds between the polyamino acidic polymers in the gas phase (blue lines) and adsorbed on the TiO<sub>2</sub> surface (red lines).

GLY -  $\beta$ -sheet (AP)

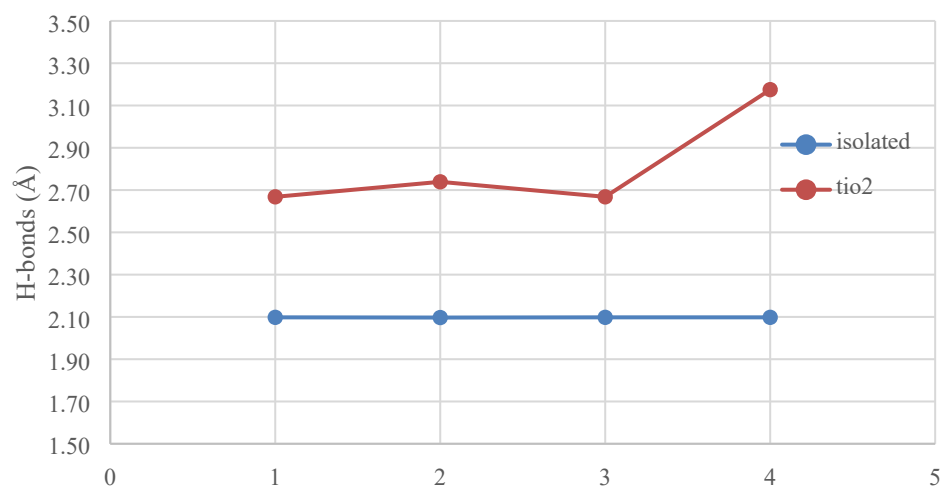

ALA -  $\beta$ -sheet (AP)

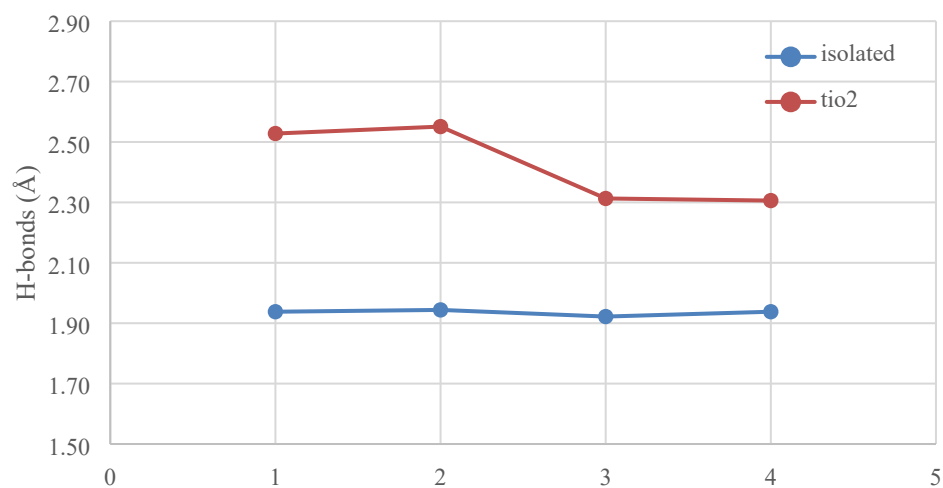

GLU -  $\beta$ -sheet (AP)

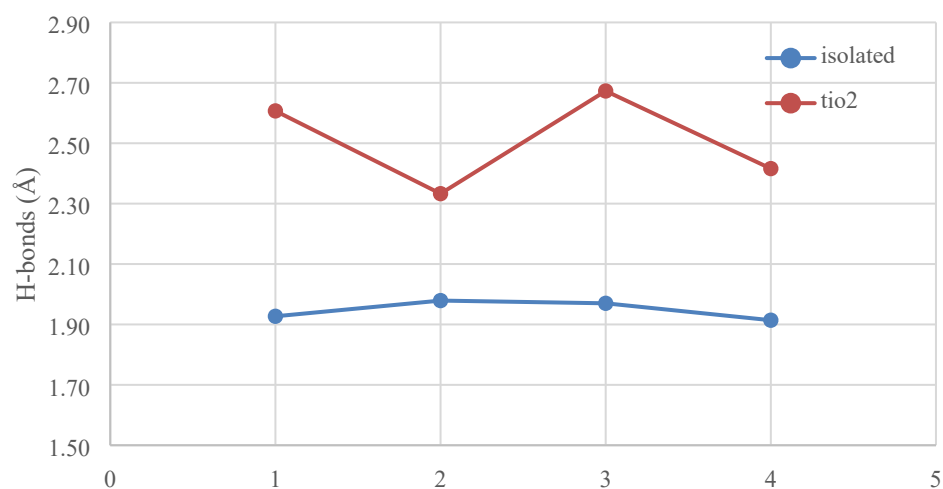

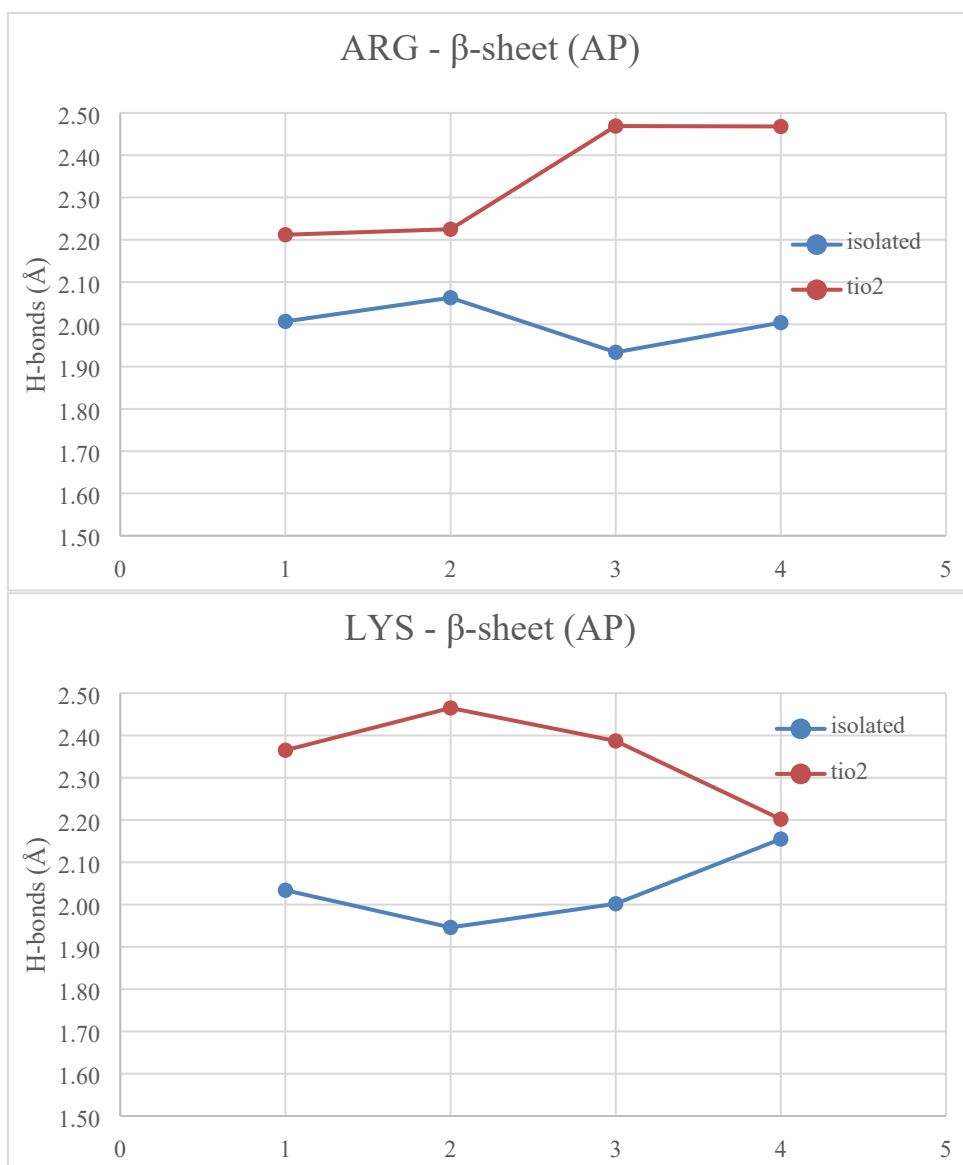

**Figure S35.** Comparison of the interstrand H-bonds between the polyamino acidic antiparallel (AP)  $\beta$ -sheets in the gas phase (blue lines) and adsorbed on the  $\text{TiO}_2$  surface (red lines).



GLY -  $\beta$ -sheet (P)

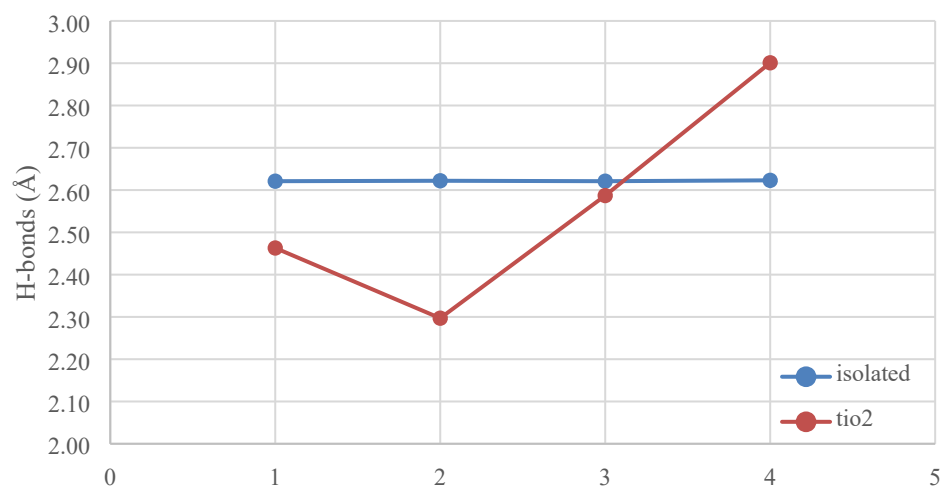

ALA -  $\beta$ -sheet (P)

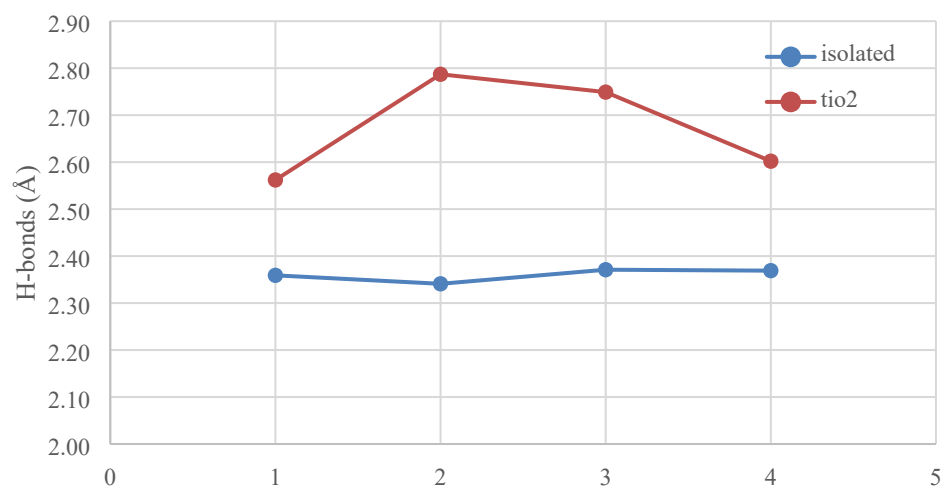

GLU -  $\beta$ -sheet (P)

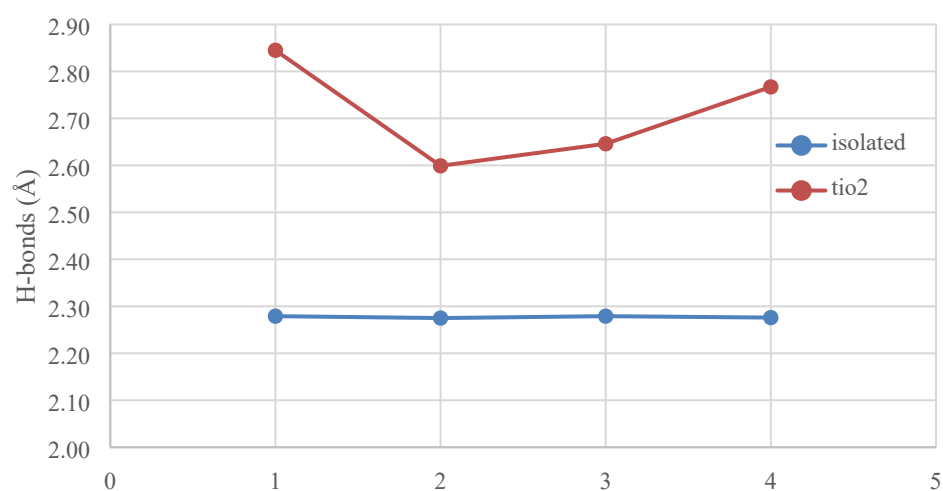

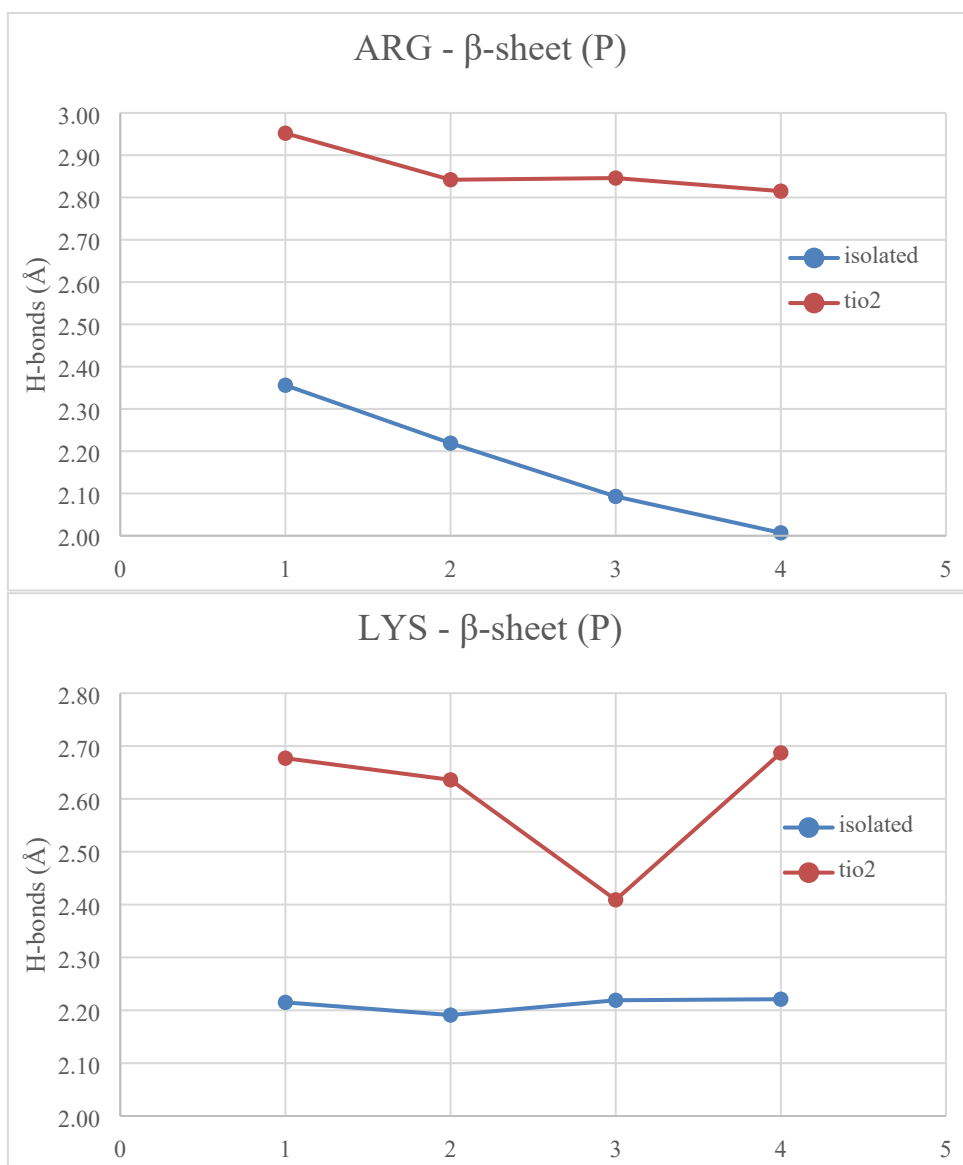

**Figure S36.** Comparison of the interstrand H-bonds between the polyamino acidic parallel (P)  $\beta$ -sheets in the gas phase (blue lines) and adsorbed on the  $\text{TiO}_2$  surface (red lines).

GLY -  $\alpha$ -helix

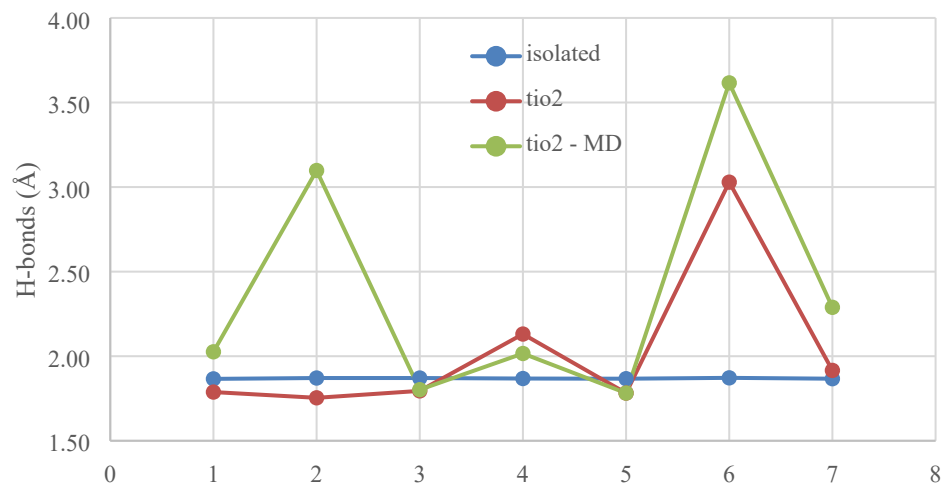

ALA -  $\alpha$ -helix

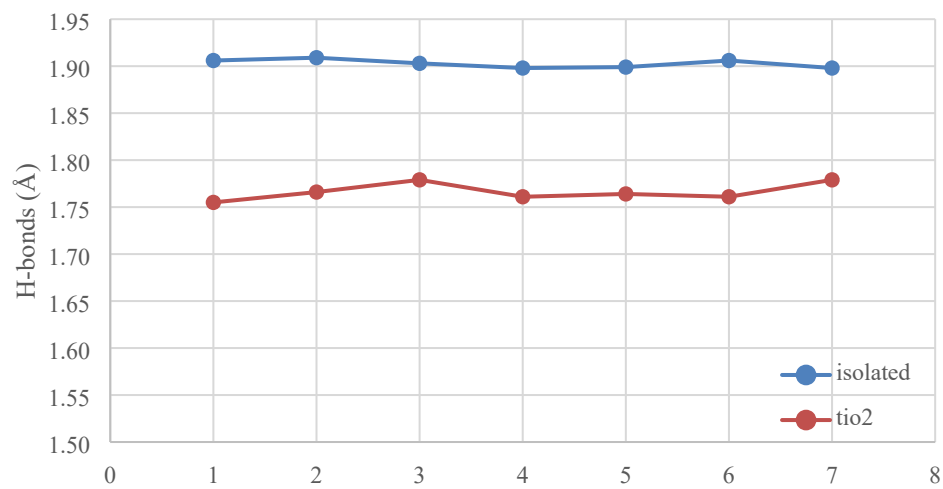

GLU -  $\alpha$ -helix

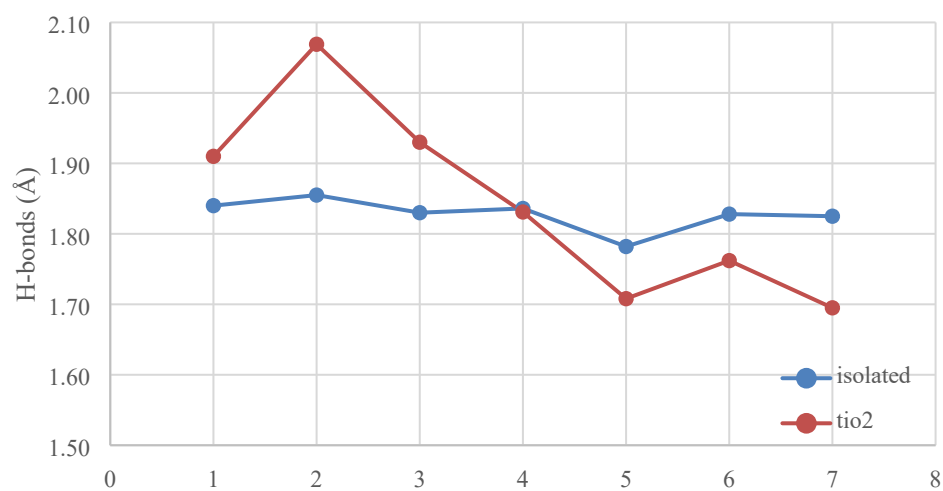

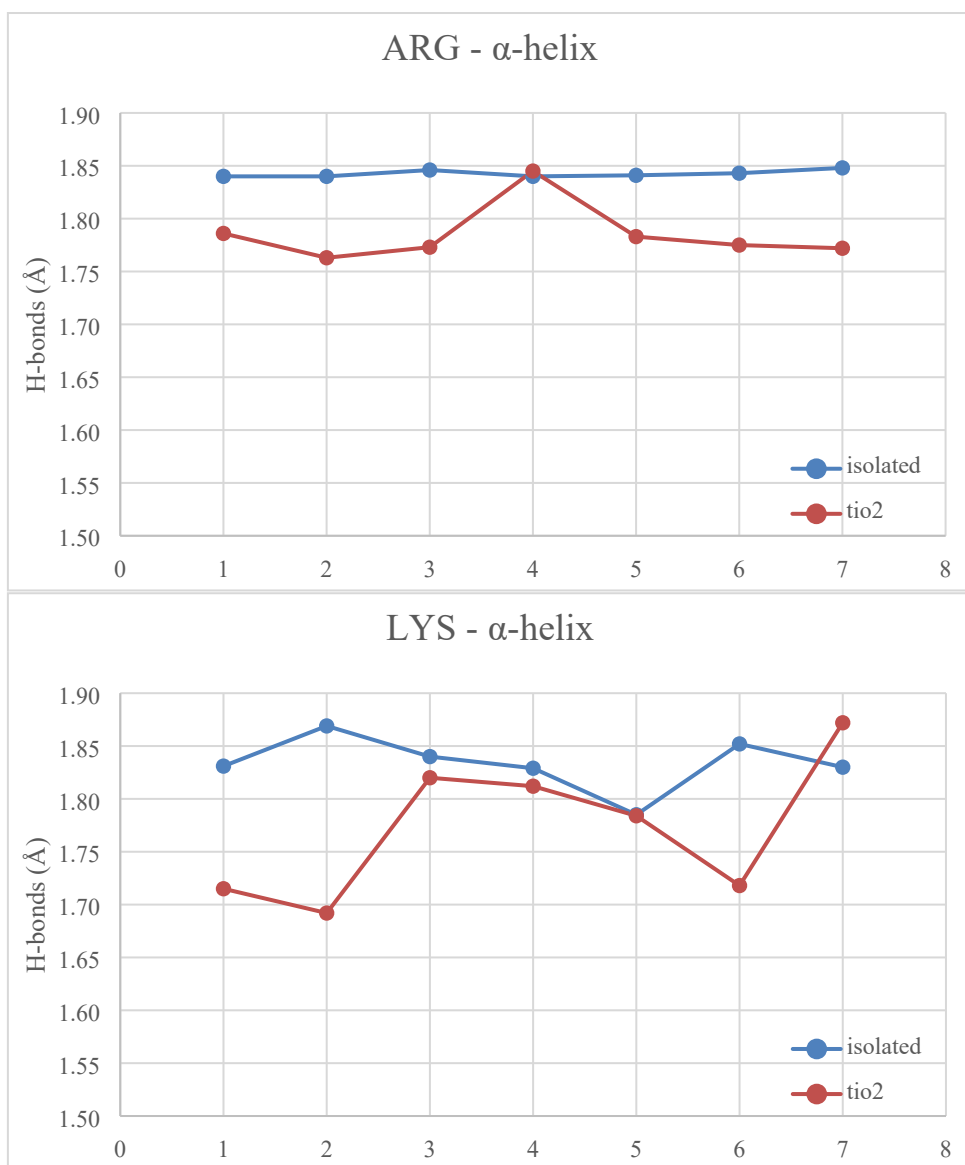

**Figure S37.** Comparison of the intrastrand H-bonds between the polyamino acidic  $\alpha$ -helix in the gas phase (blue lines) and adsorbed on the  $\text{TiO}_2$  surface (red lines).

## **Optimized Fractionary Coordinates**

Optimized fractionary coordinates have been written in the MOLDRAW format (MOLDRAW is freely available at <http://www.moldraw.unito.it>). Each coordinates block starts with a TITLE record and finishes with a “-1 0 0 0” record. Both input and output files are available in the poly\_aa\_structure.zip archive.
